# Supplementary material for: Sensory cortex is optimized for prediction of future input
Source: eLife journal article supplement (doi:10.7554/elife.31557), 2018-06-18
Supplement: supp [file elife-31557-supp-v1.zip]

Archive with 20 entries (20 files):
- elife_poa_e31557_Figure_4_figure_supplement_5.pdf
- elife_poa_e31557_Figure_4_figure_supplement_3.pdf
- elife_poa_e31557_Figure_4_figure_supplement_1.pdf
- elife_poa_e31557_Figure_4_figure_supplement_4.pdf
- elife_poa_e31557_Figure_5_figure_supplement_1.pdf
- elife_poa_e31557_Figure_4_figure_supplement_7.pdf
- elife_poa_e31557_Figure_4_figure_supplement_2.pdf
- elife_poa_e31557_Figure_8_figure_supplement_3.pdf
- elife_poa_e31557_Figure_4_figure_supplement_6.pdf
- elife_poa_e31557_Figure_6_figure_supplement_1.pdf
- elife_poa_e31557_Figure_8_figure_supplement_1.pdf
- elife_poa_e31557_Transparent_Reporting_File.docx
- elife_poa_e31557_Figure_7_figure_supplement_1.pdf
- elife_poa_e31557_Figure_7_figure_supplement_2.pdf
- elife_poa_e31557_Figure_8_figure_supplement_2.pdf
- elife_poa_e31557_Figure_5_figure_supplement_2.pdf
- elife_poa_e31557_Figure_5_figure_supplement_4.pdf
- elife_poa_e31557_Figure_7_figure_supplement_3.pdf
- elife_poa_e31557_Figure_5_figure_supplement_5.pdf
- elife_poa_e31557_Figure_5_figure_supplement_3.pdf
