# Supplementary figures and images for: Sensory cortex is optimized for prediction of future input
Source: eLife journal article supplement (doi:10.7554/elife.31557), 2018-06-18

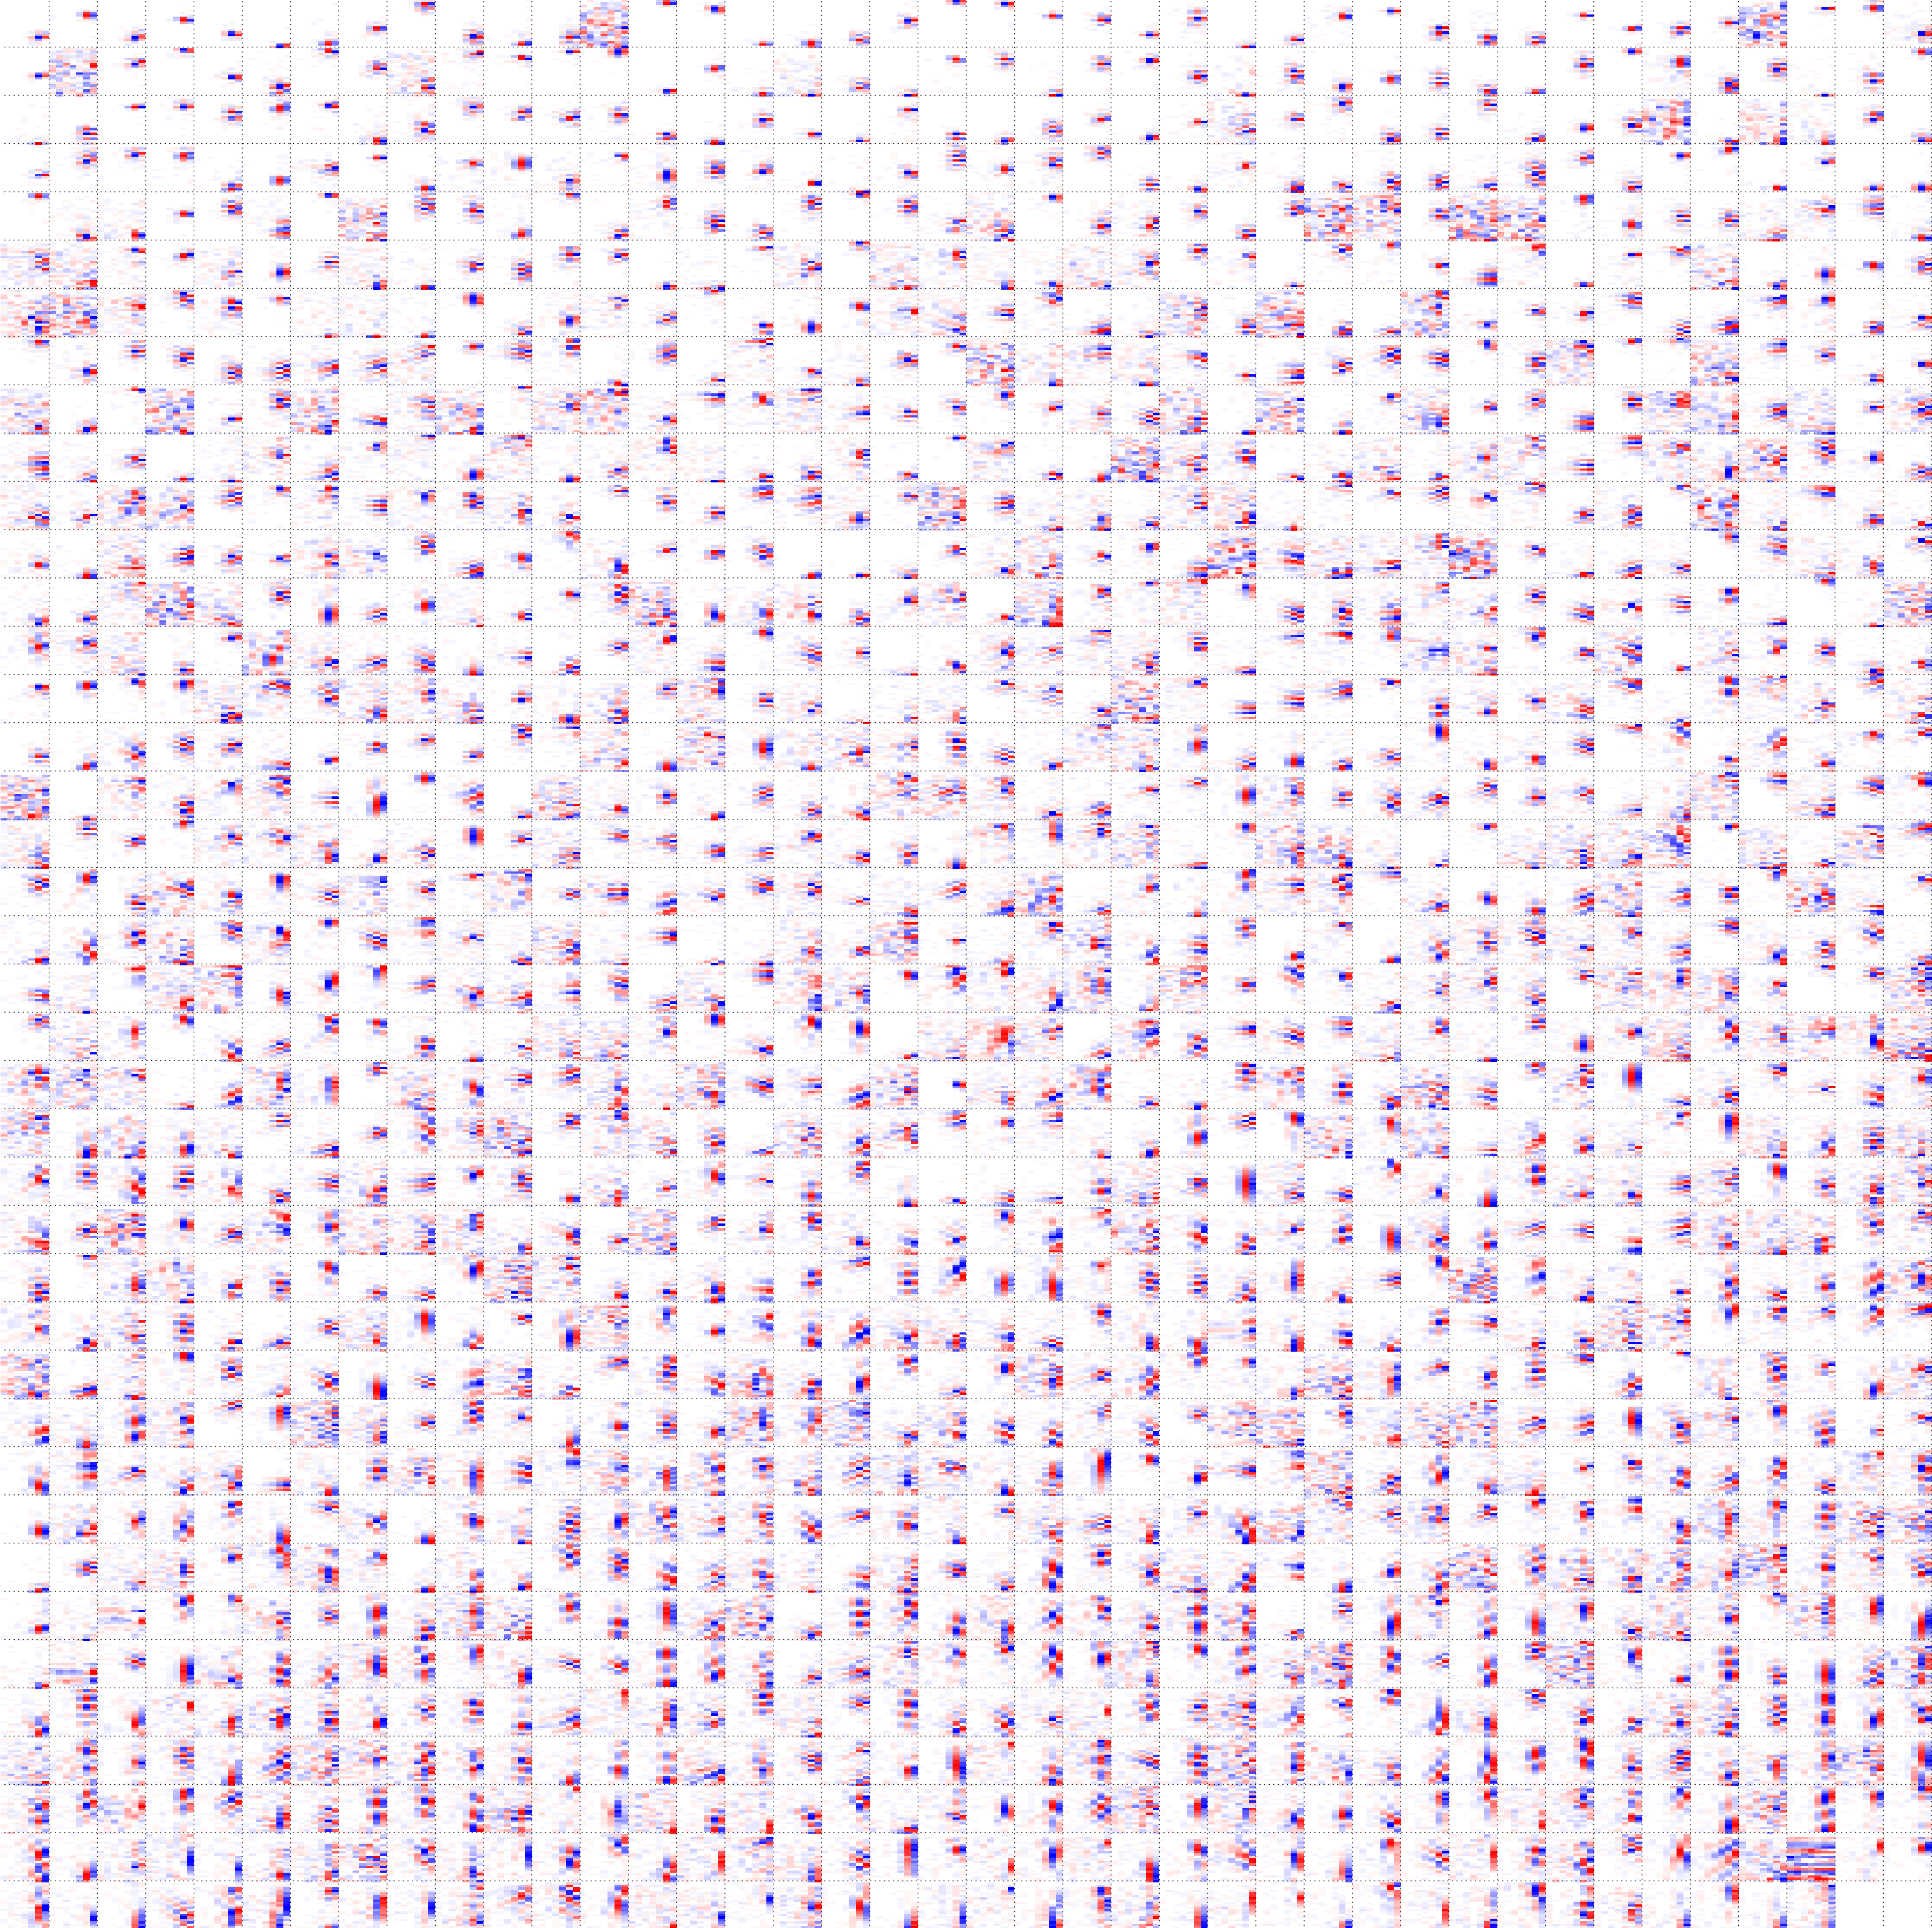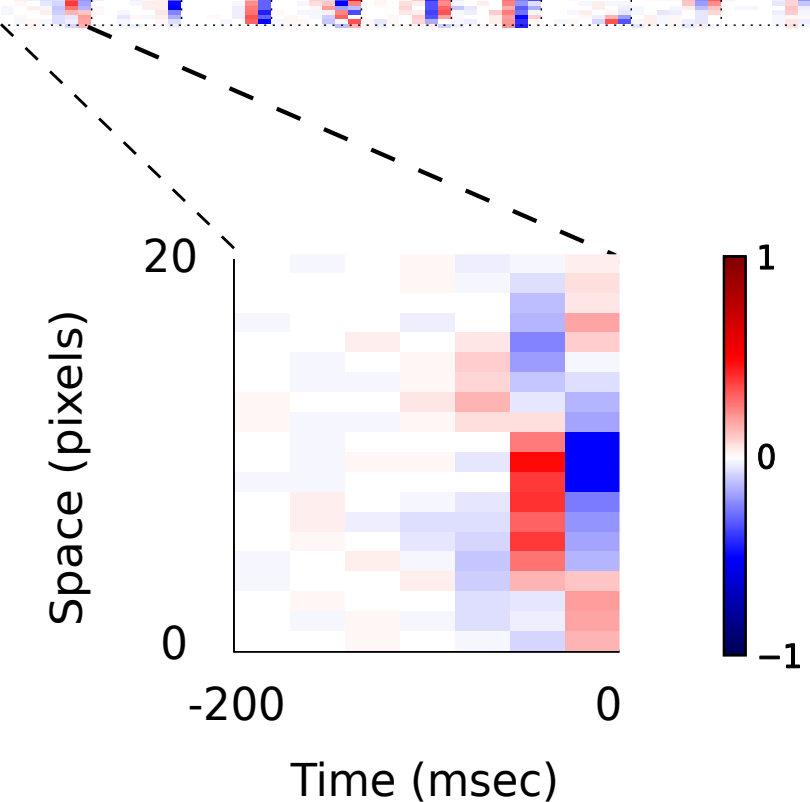

Supplement: supp [file elife-31557-supp-v1.zip]

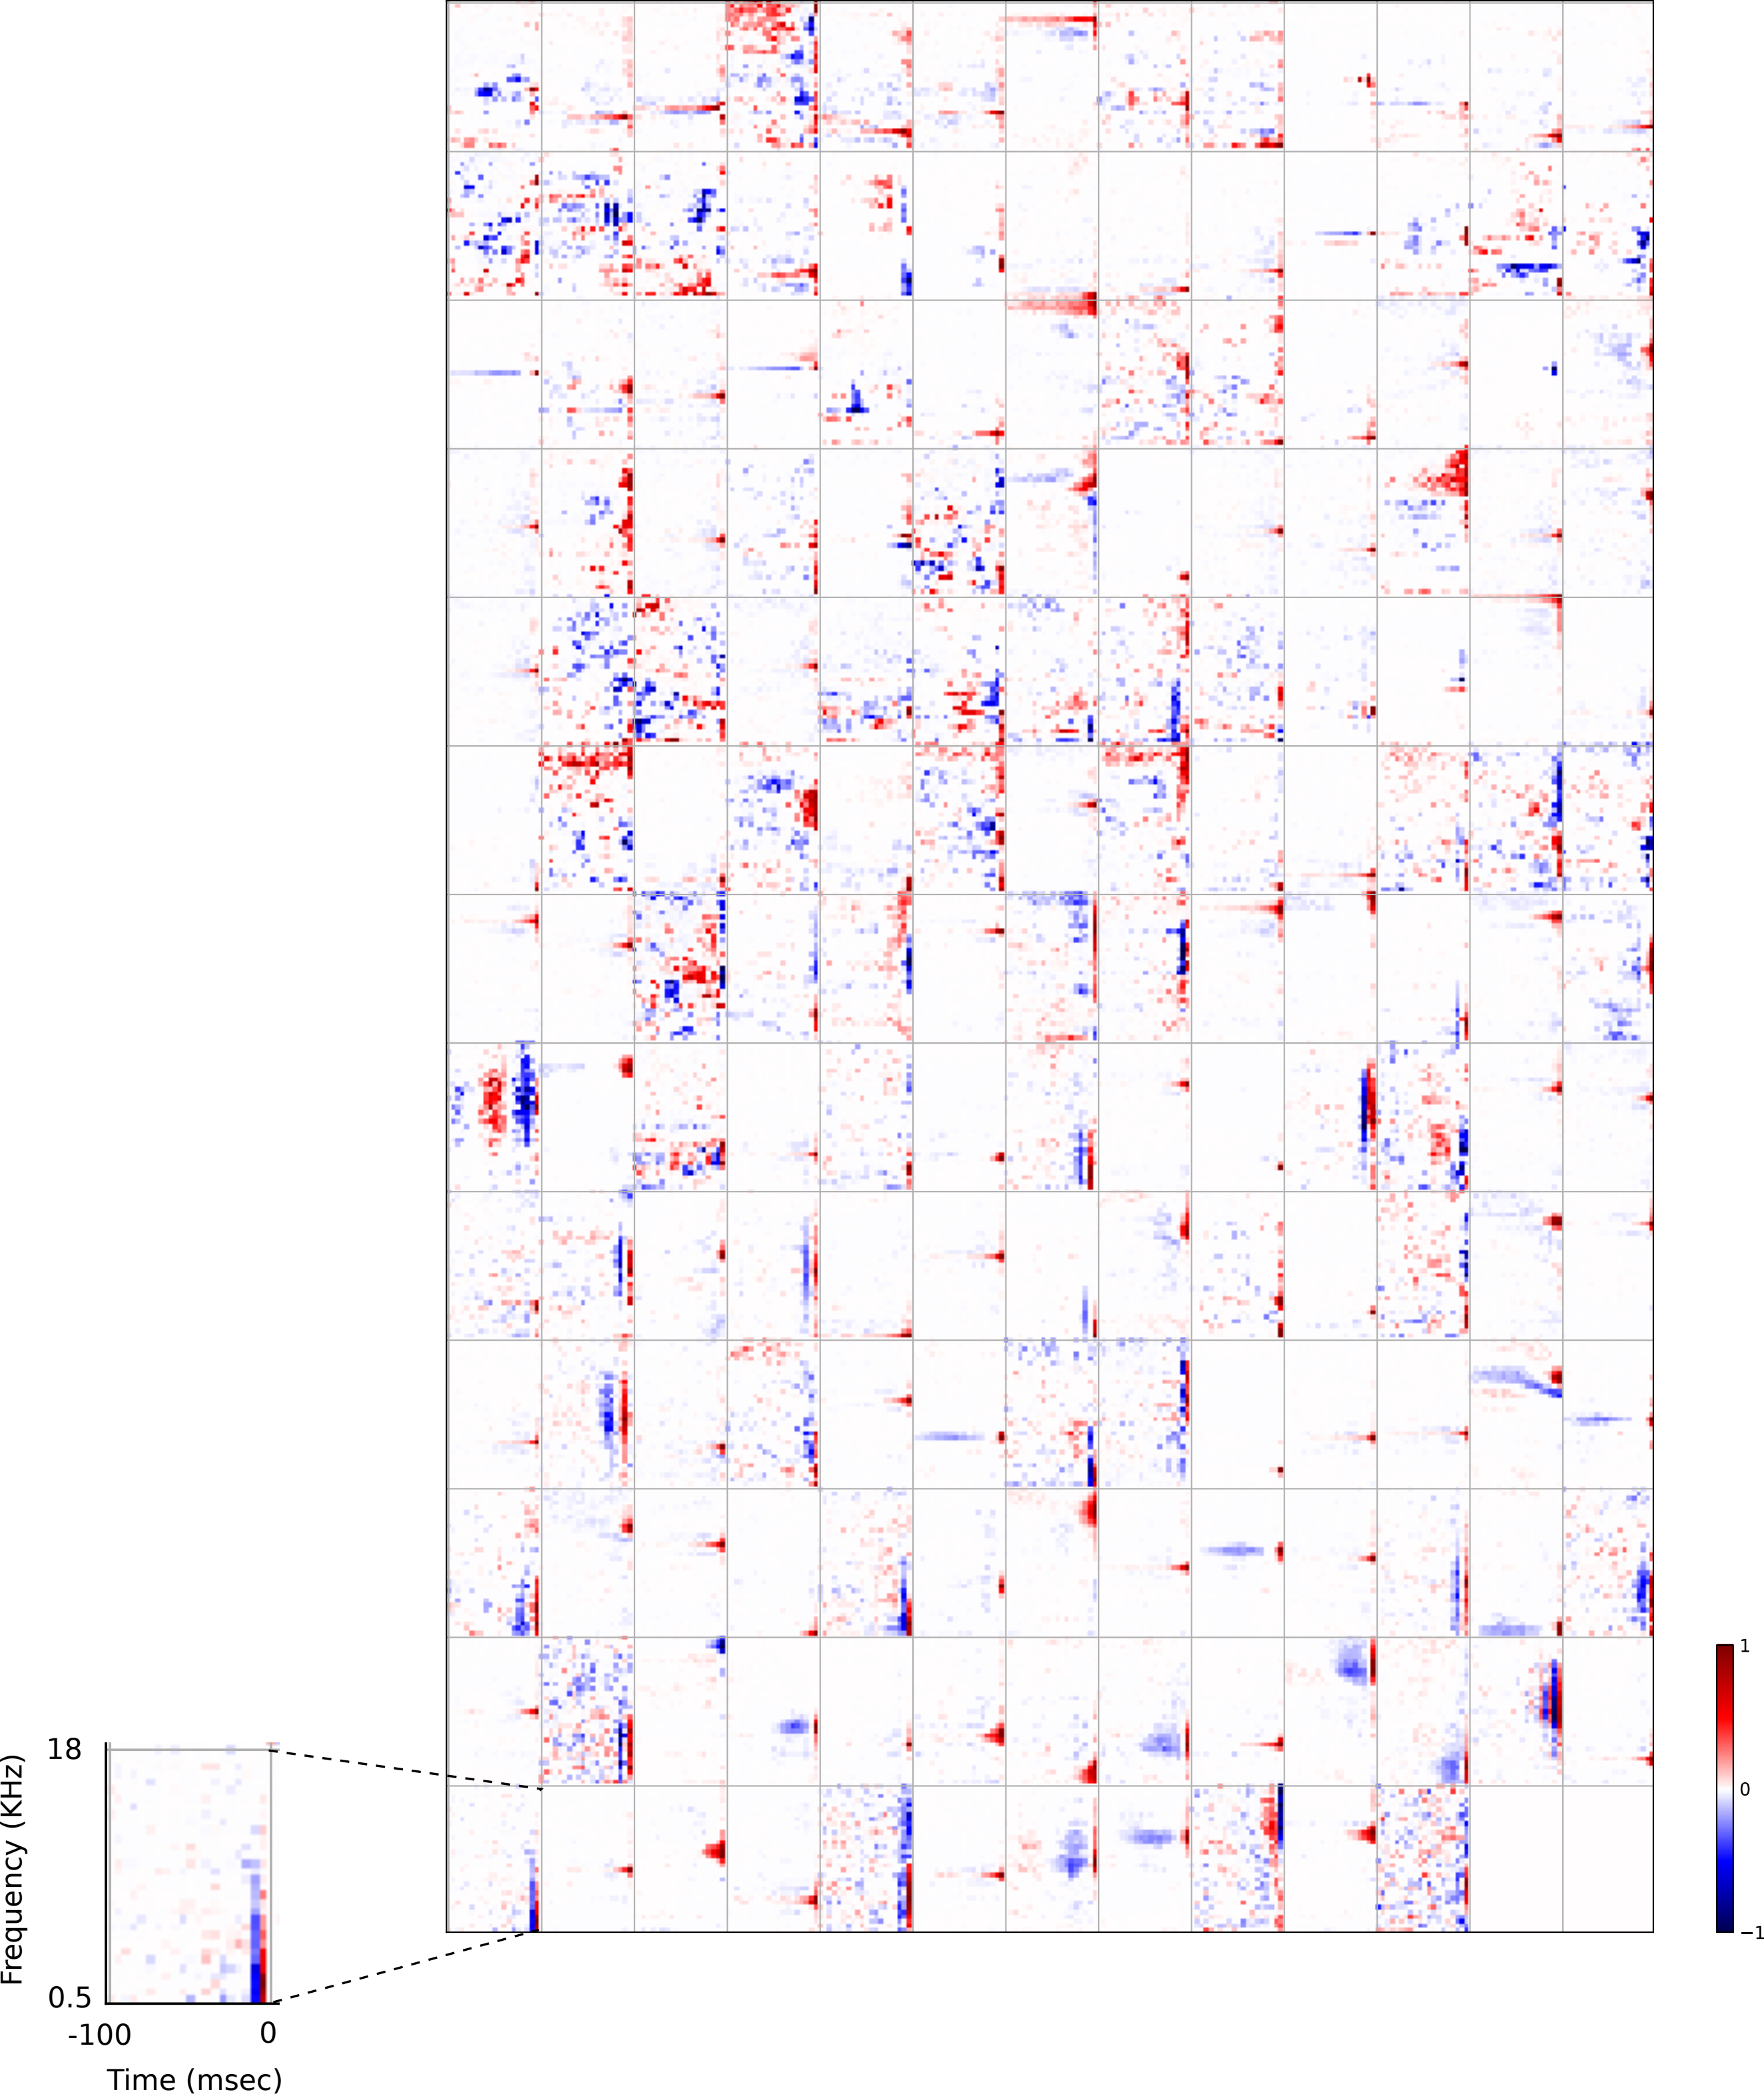

Supplement: supp [file elife-31557-supp-v1.zip]

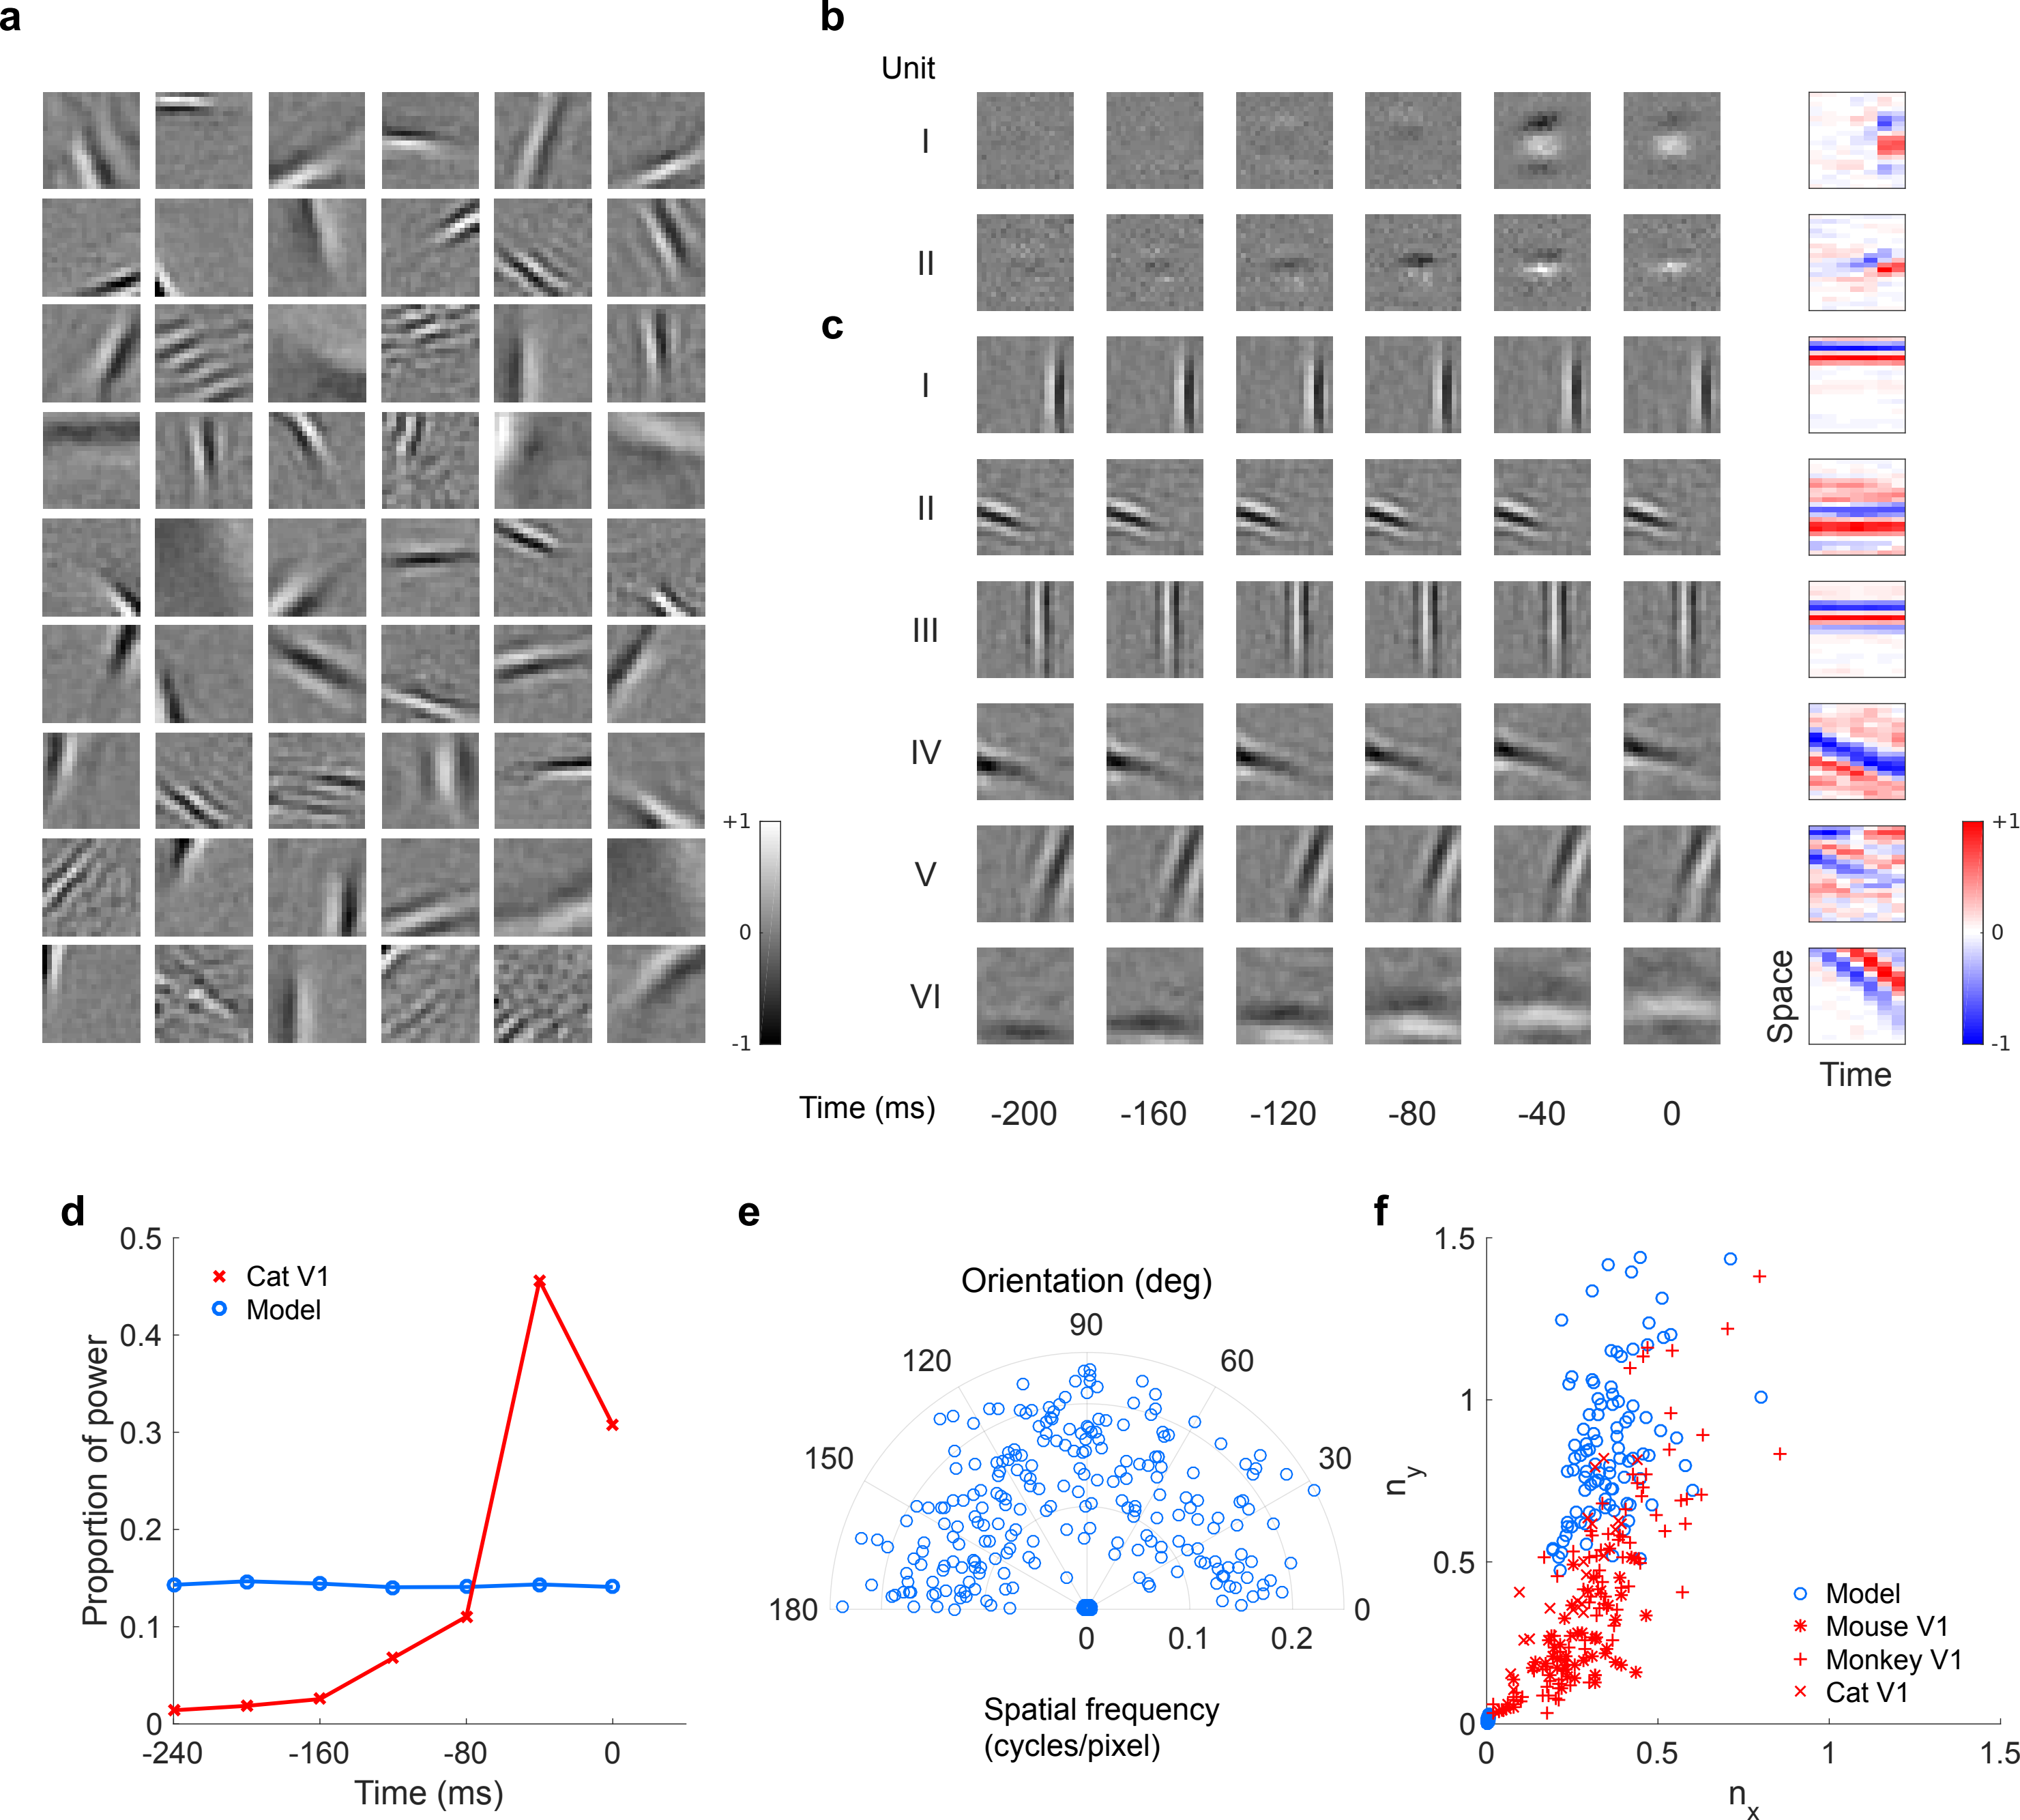

Supplement: supp [file elife-31557-supp-v1.zip]

# Heatmap

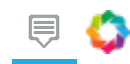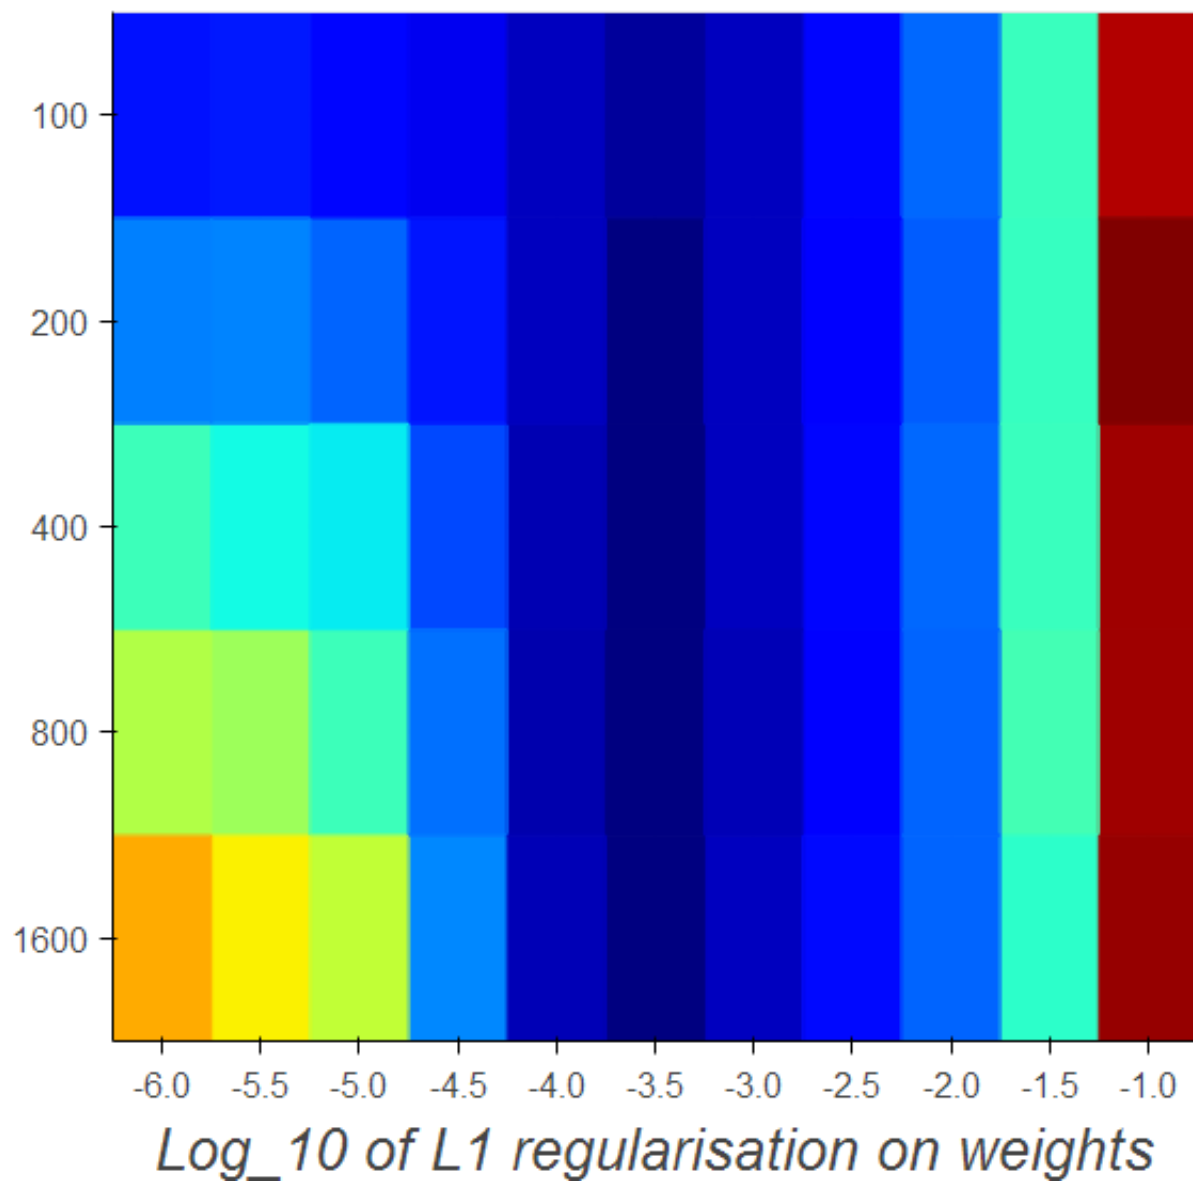

# Corresponding spectrotemporal RFs

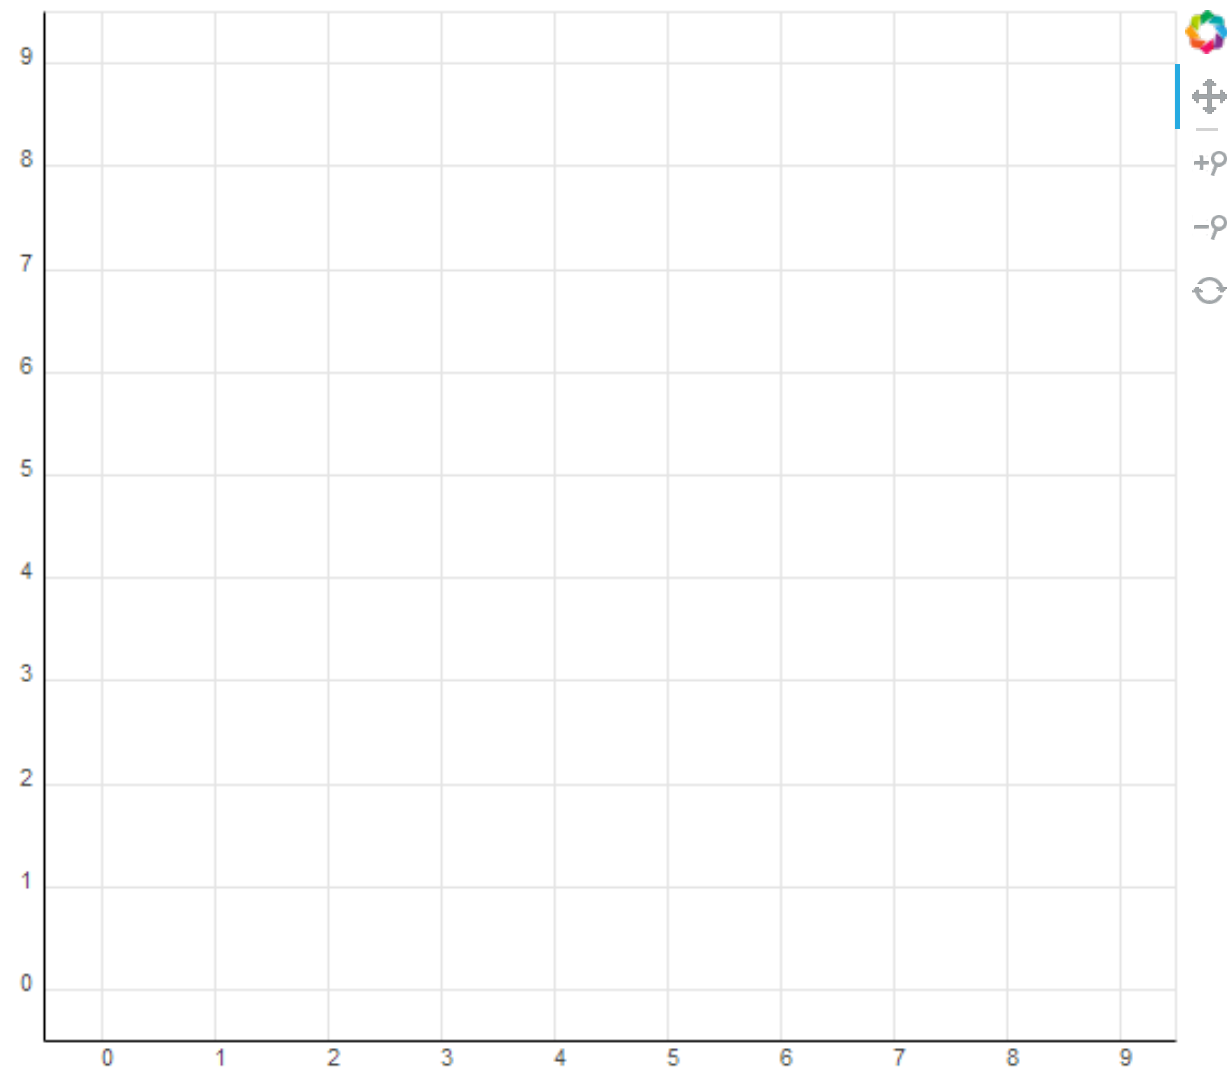

Supplement: supp [file elife-31557-supp-v1.zip]

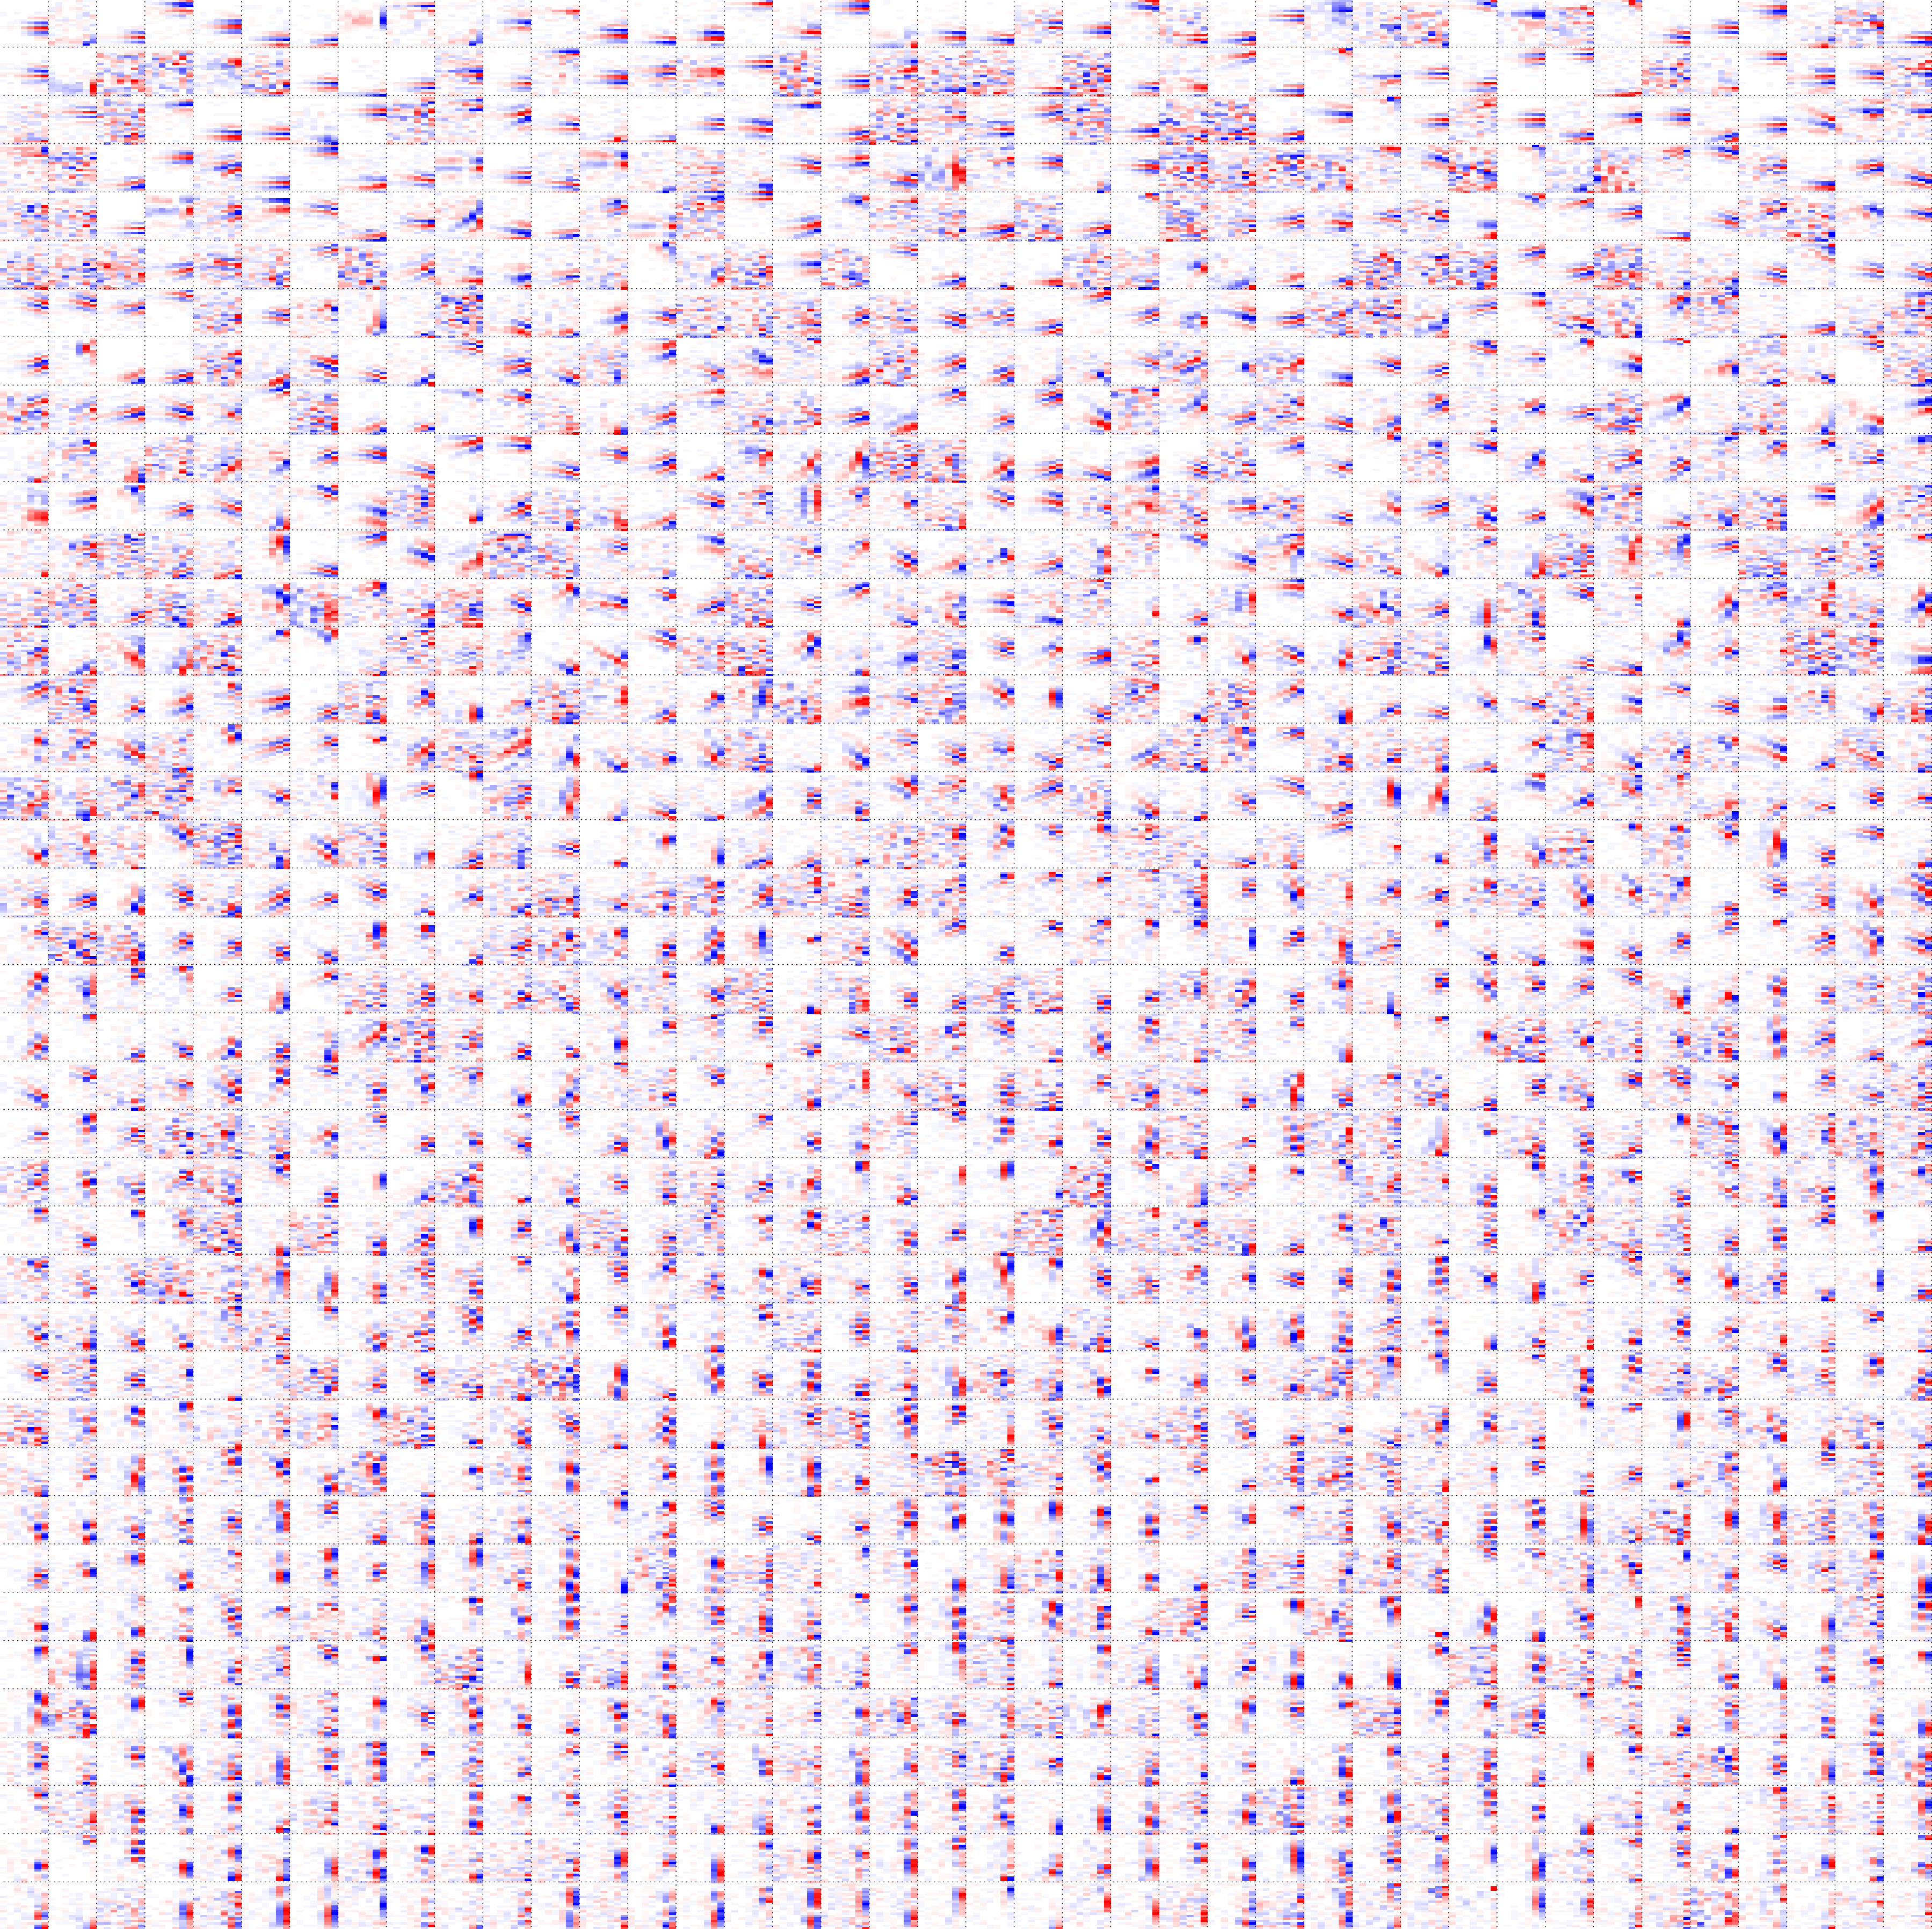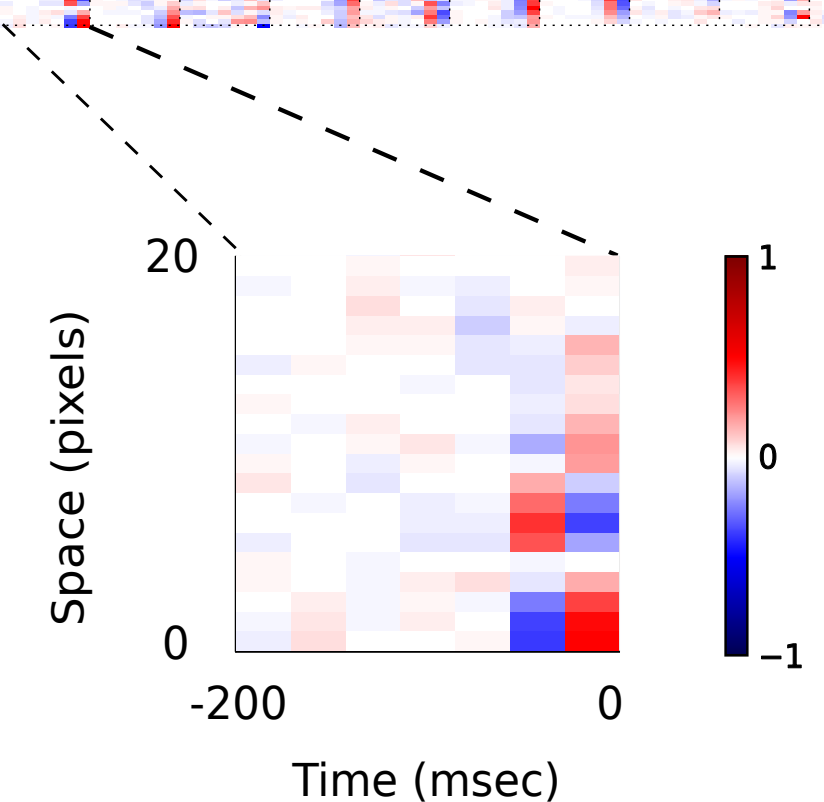

Supplement: supp [file elife-31557-supp-v1.zip]

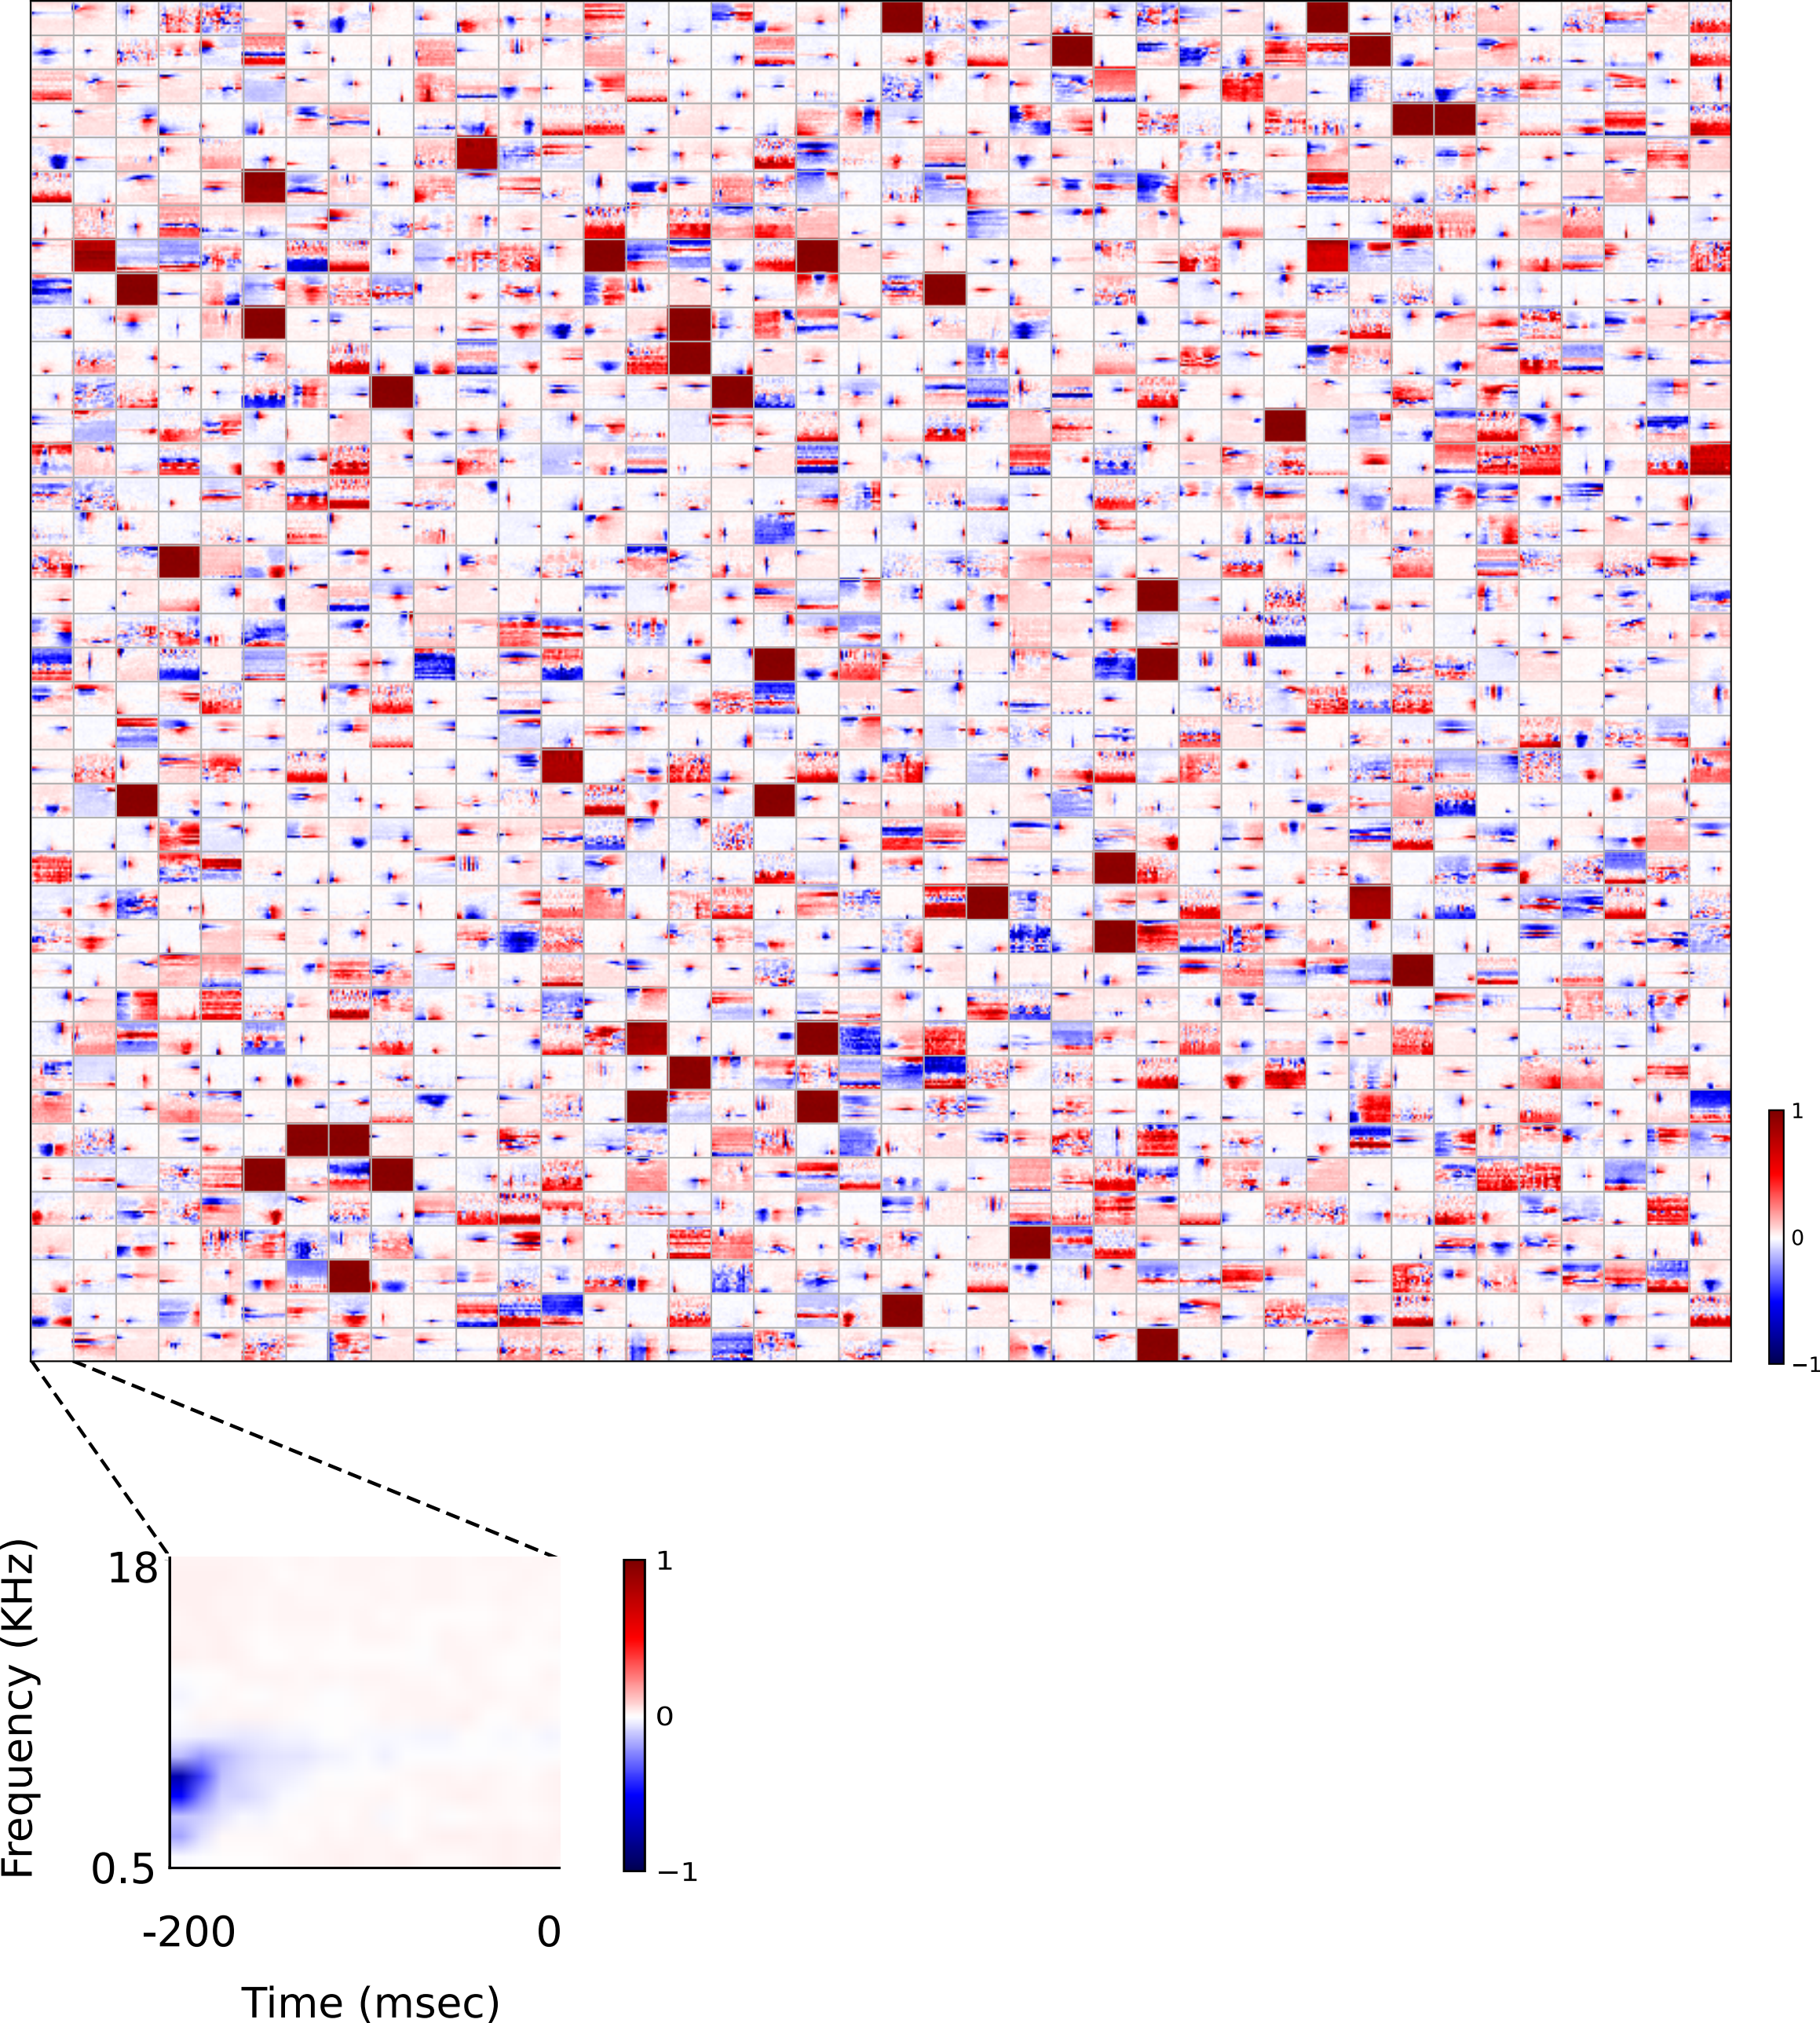

Supplement: supp [file elife-31557-supp-v1.zip]

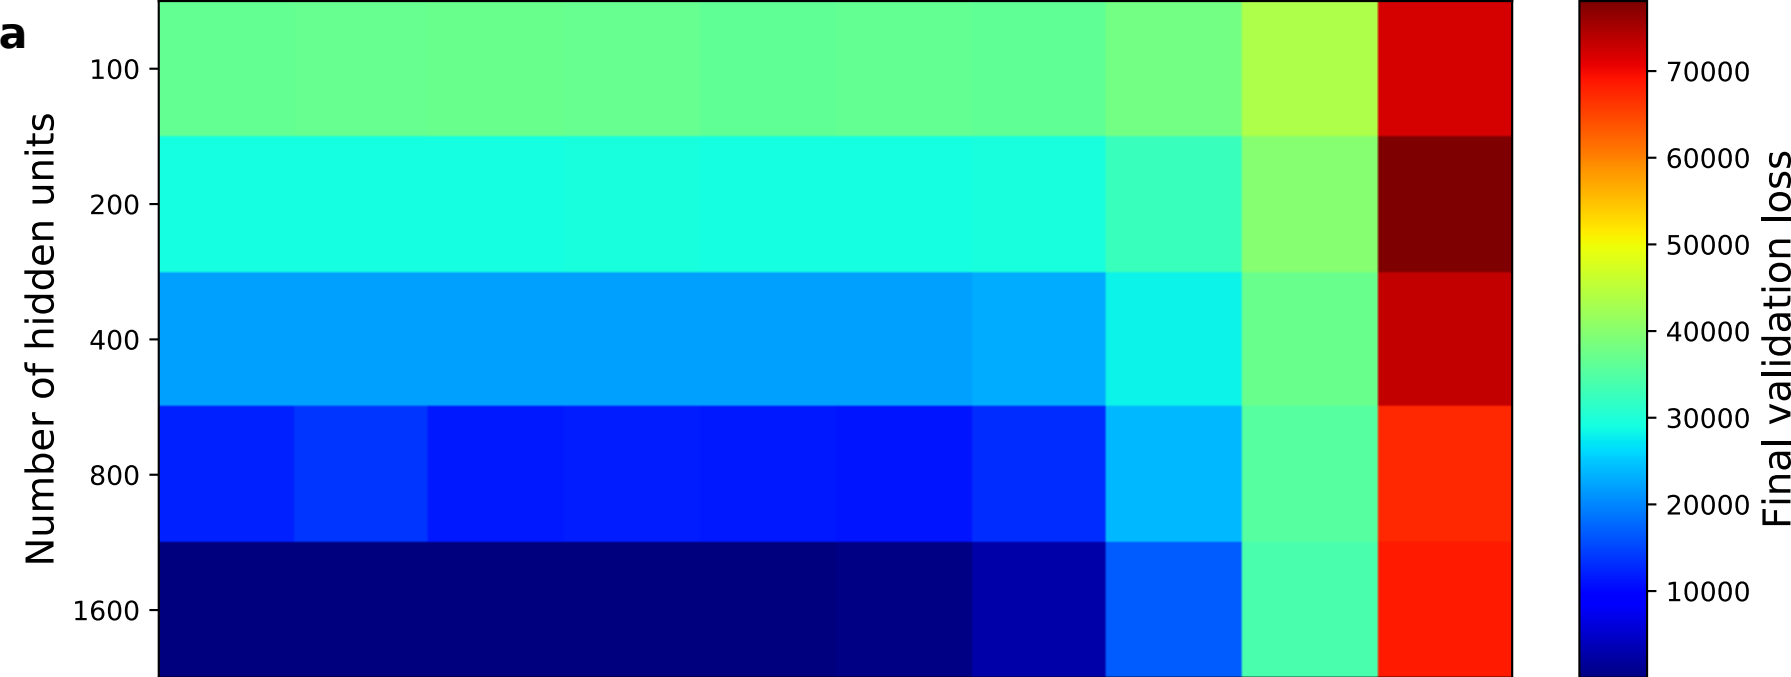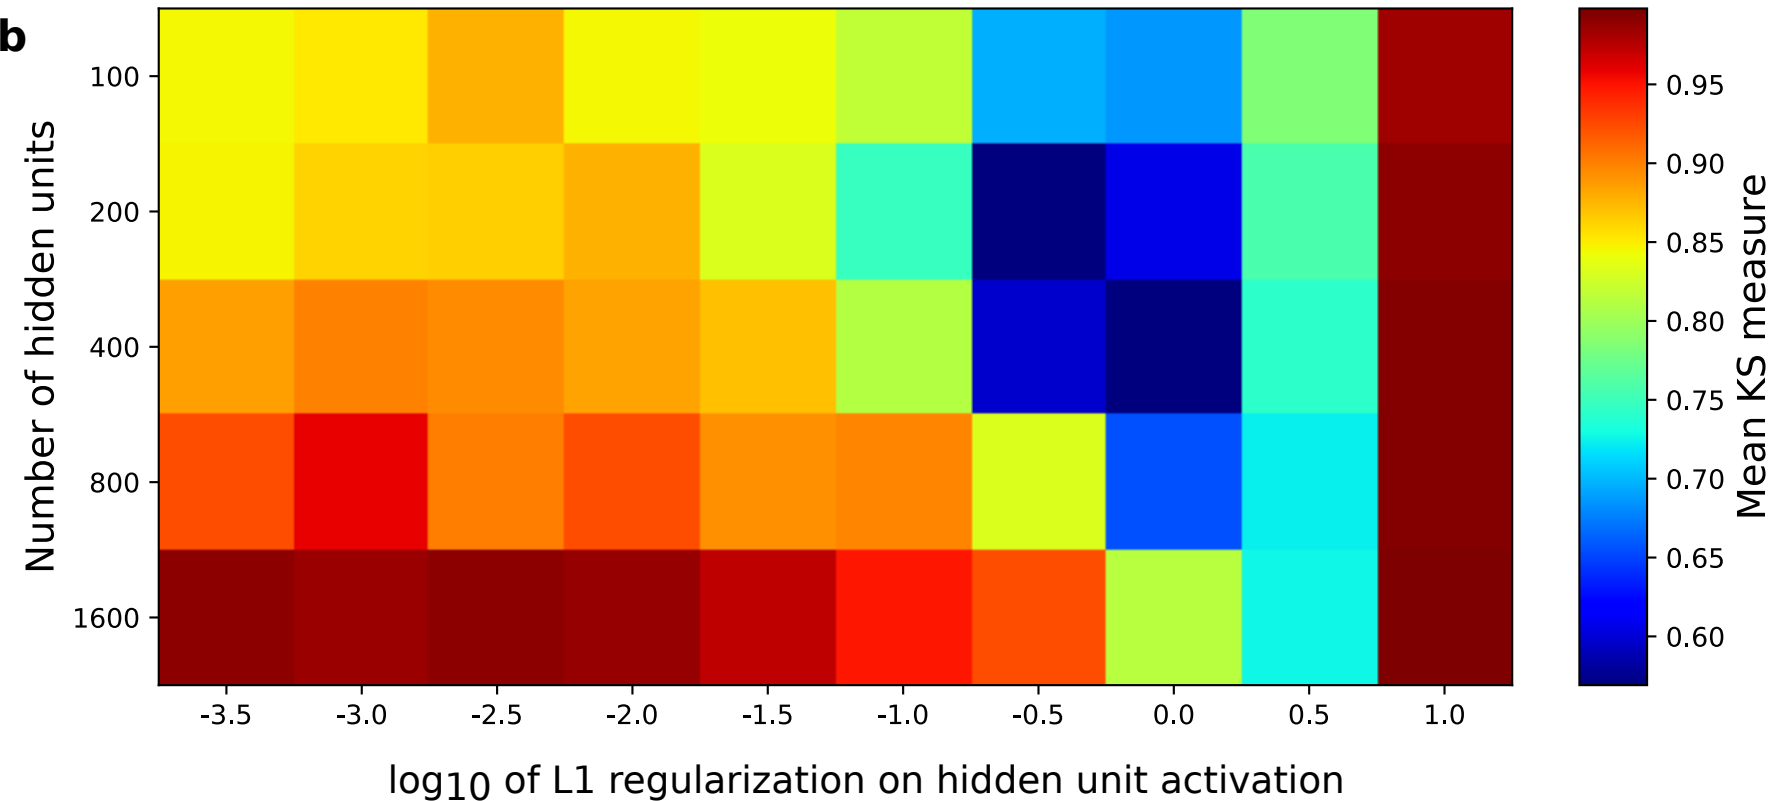

Supplement: supp [file elife-31557-supp-v1.zip]

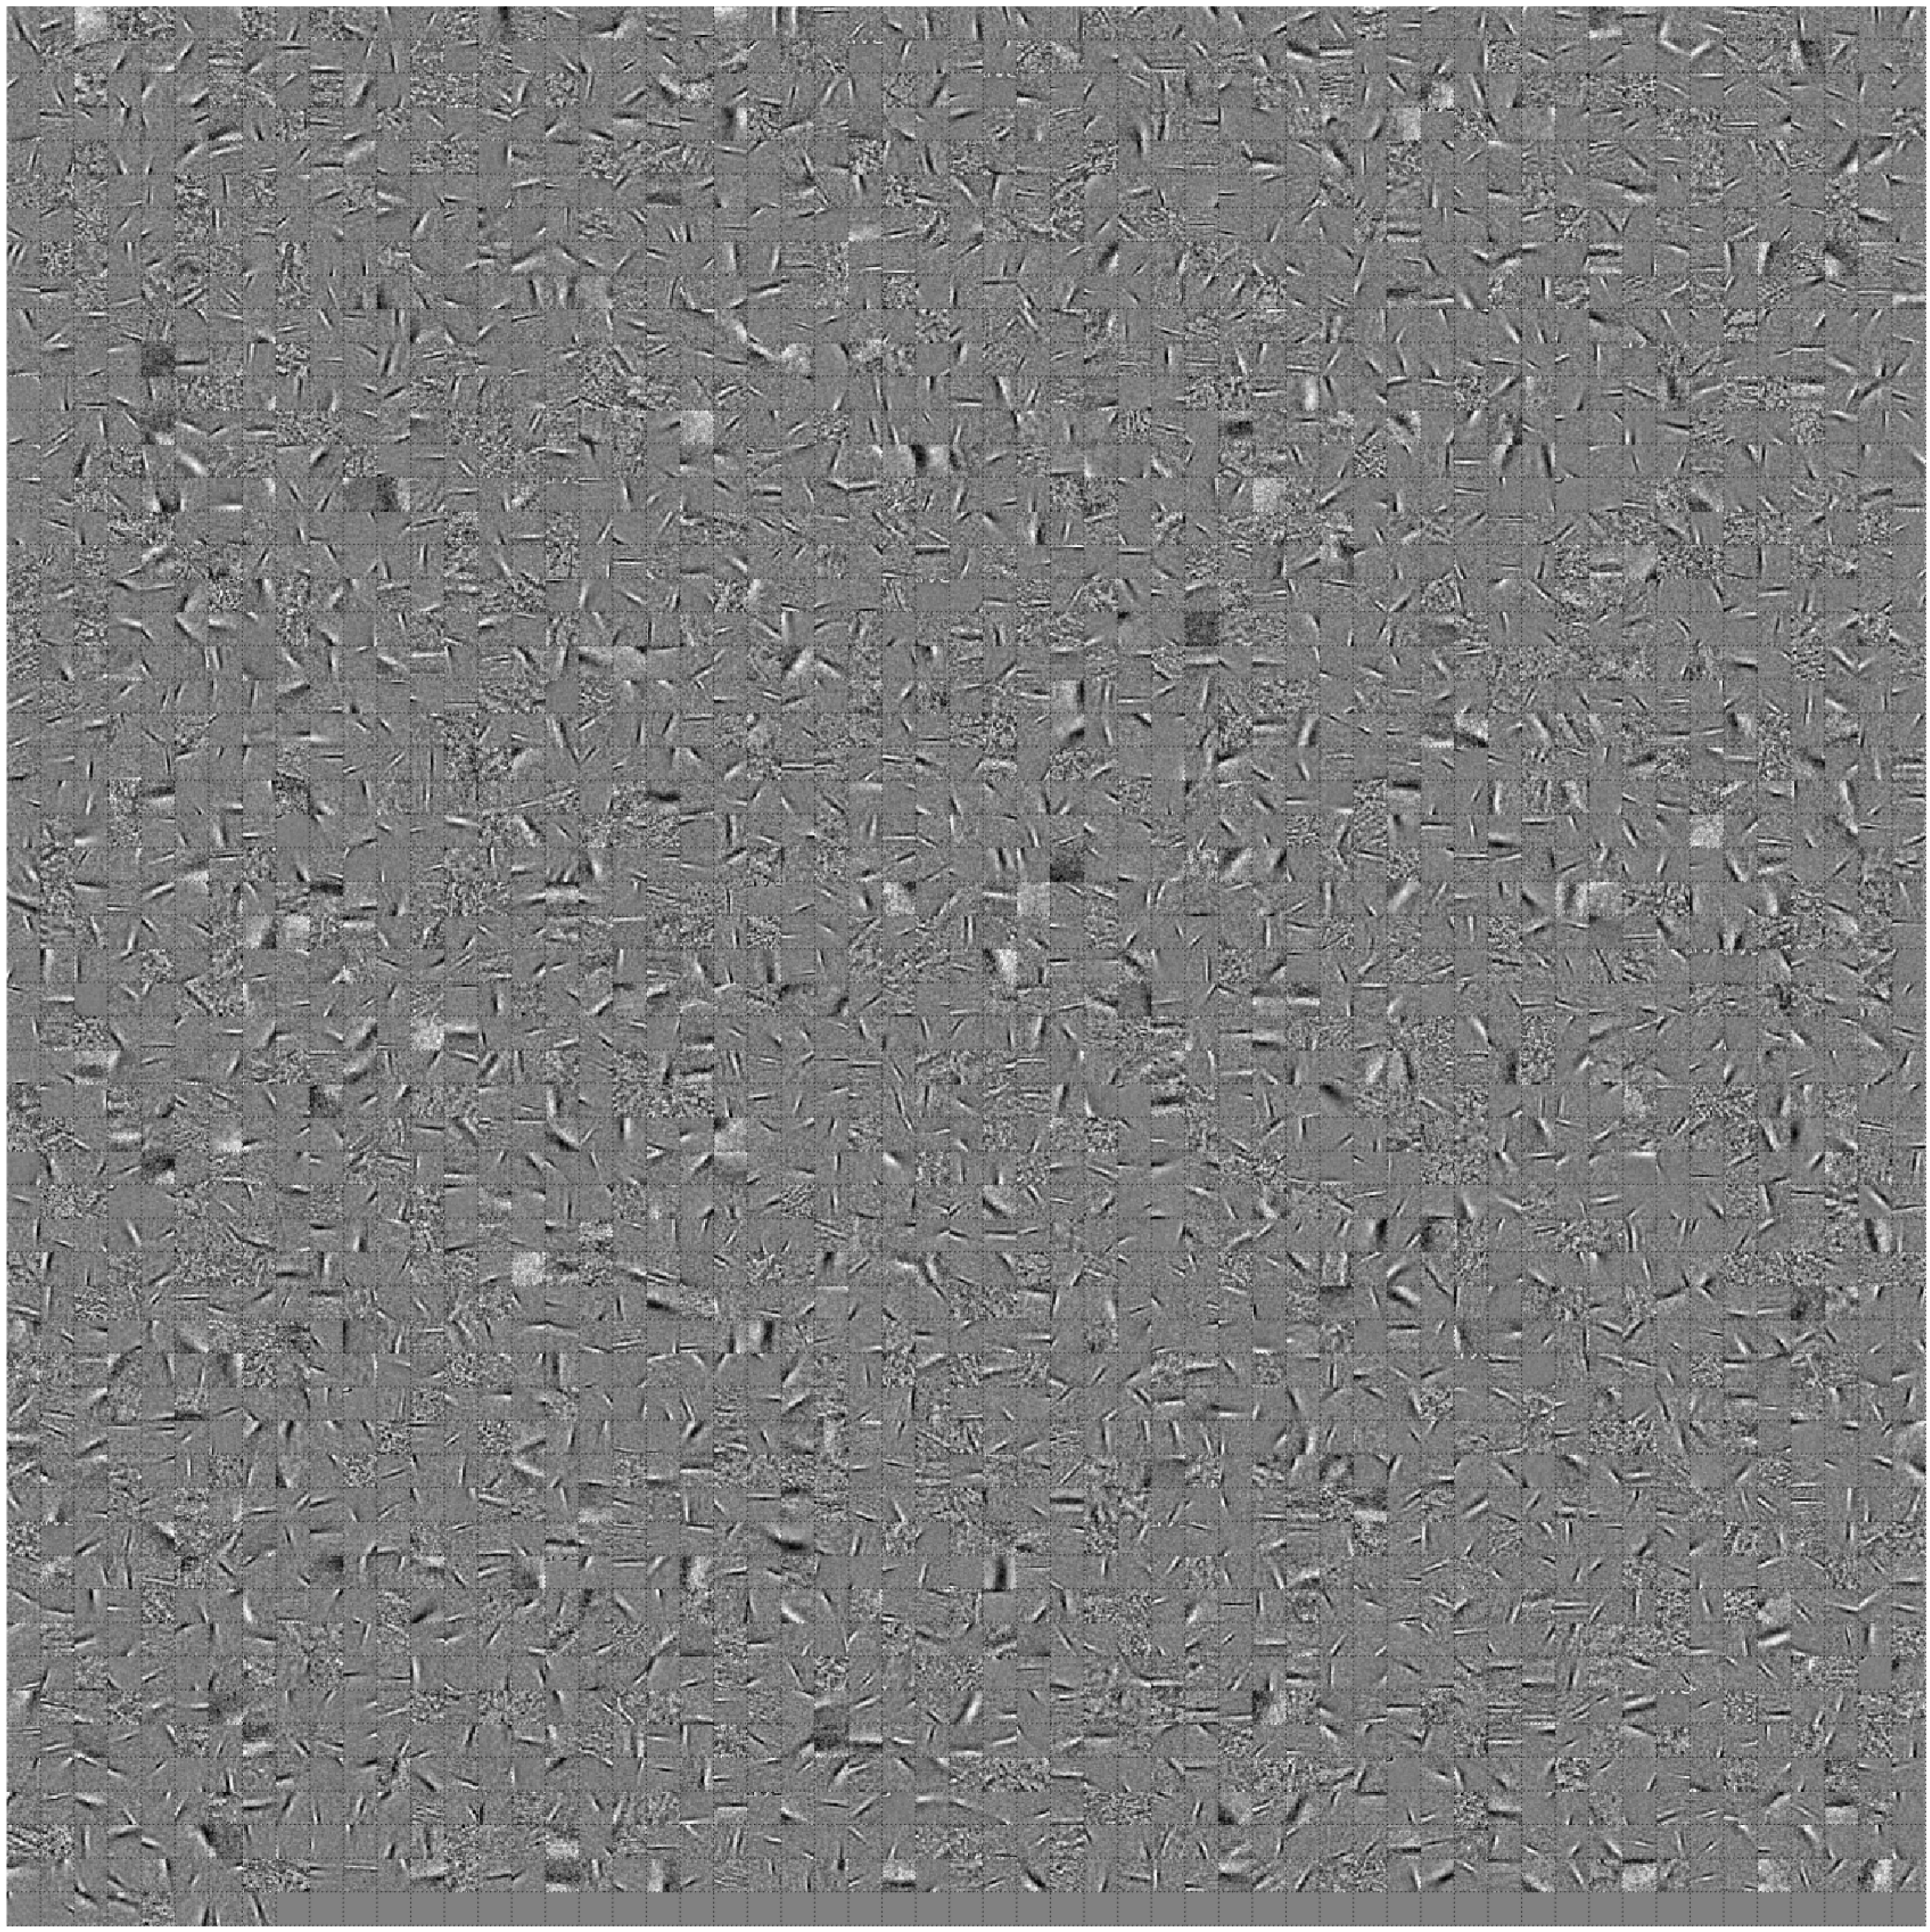

Supplement: supp [file elife-31557-supp-v1.zip]

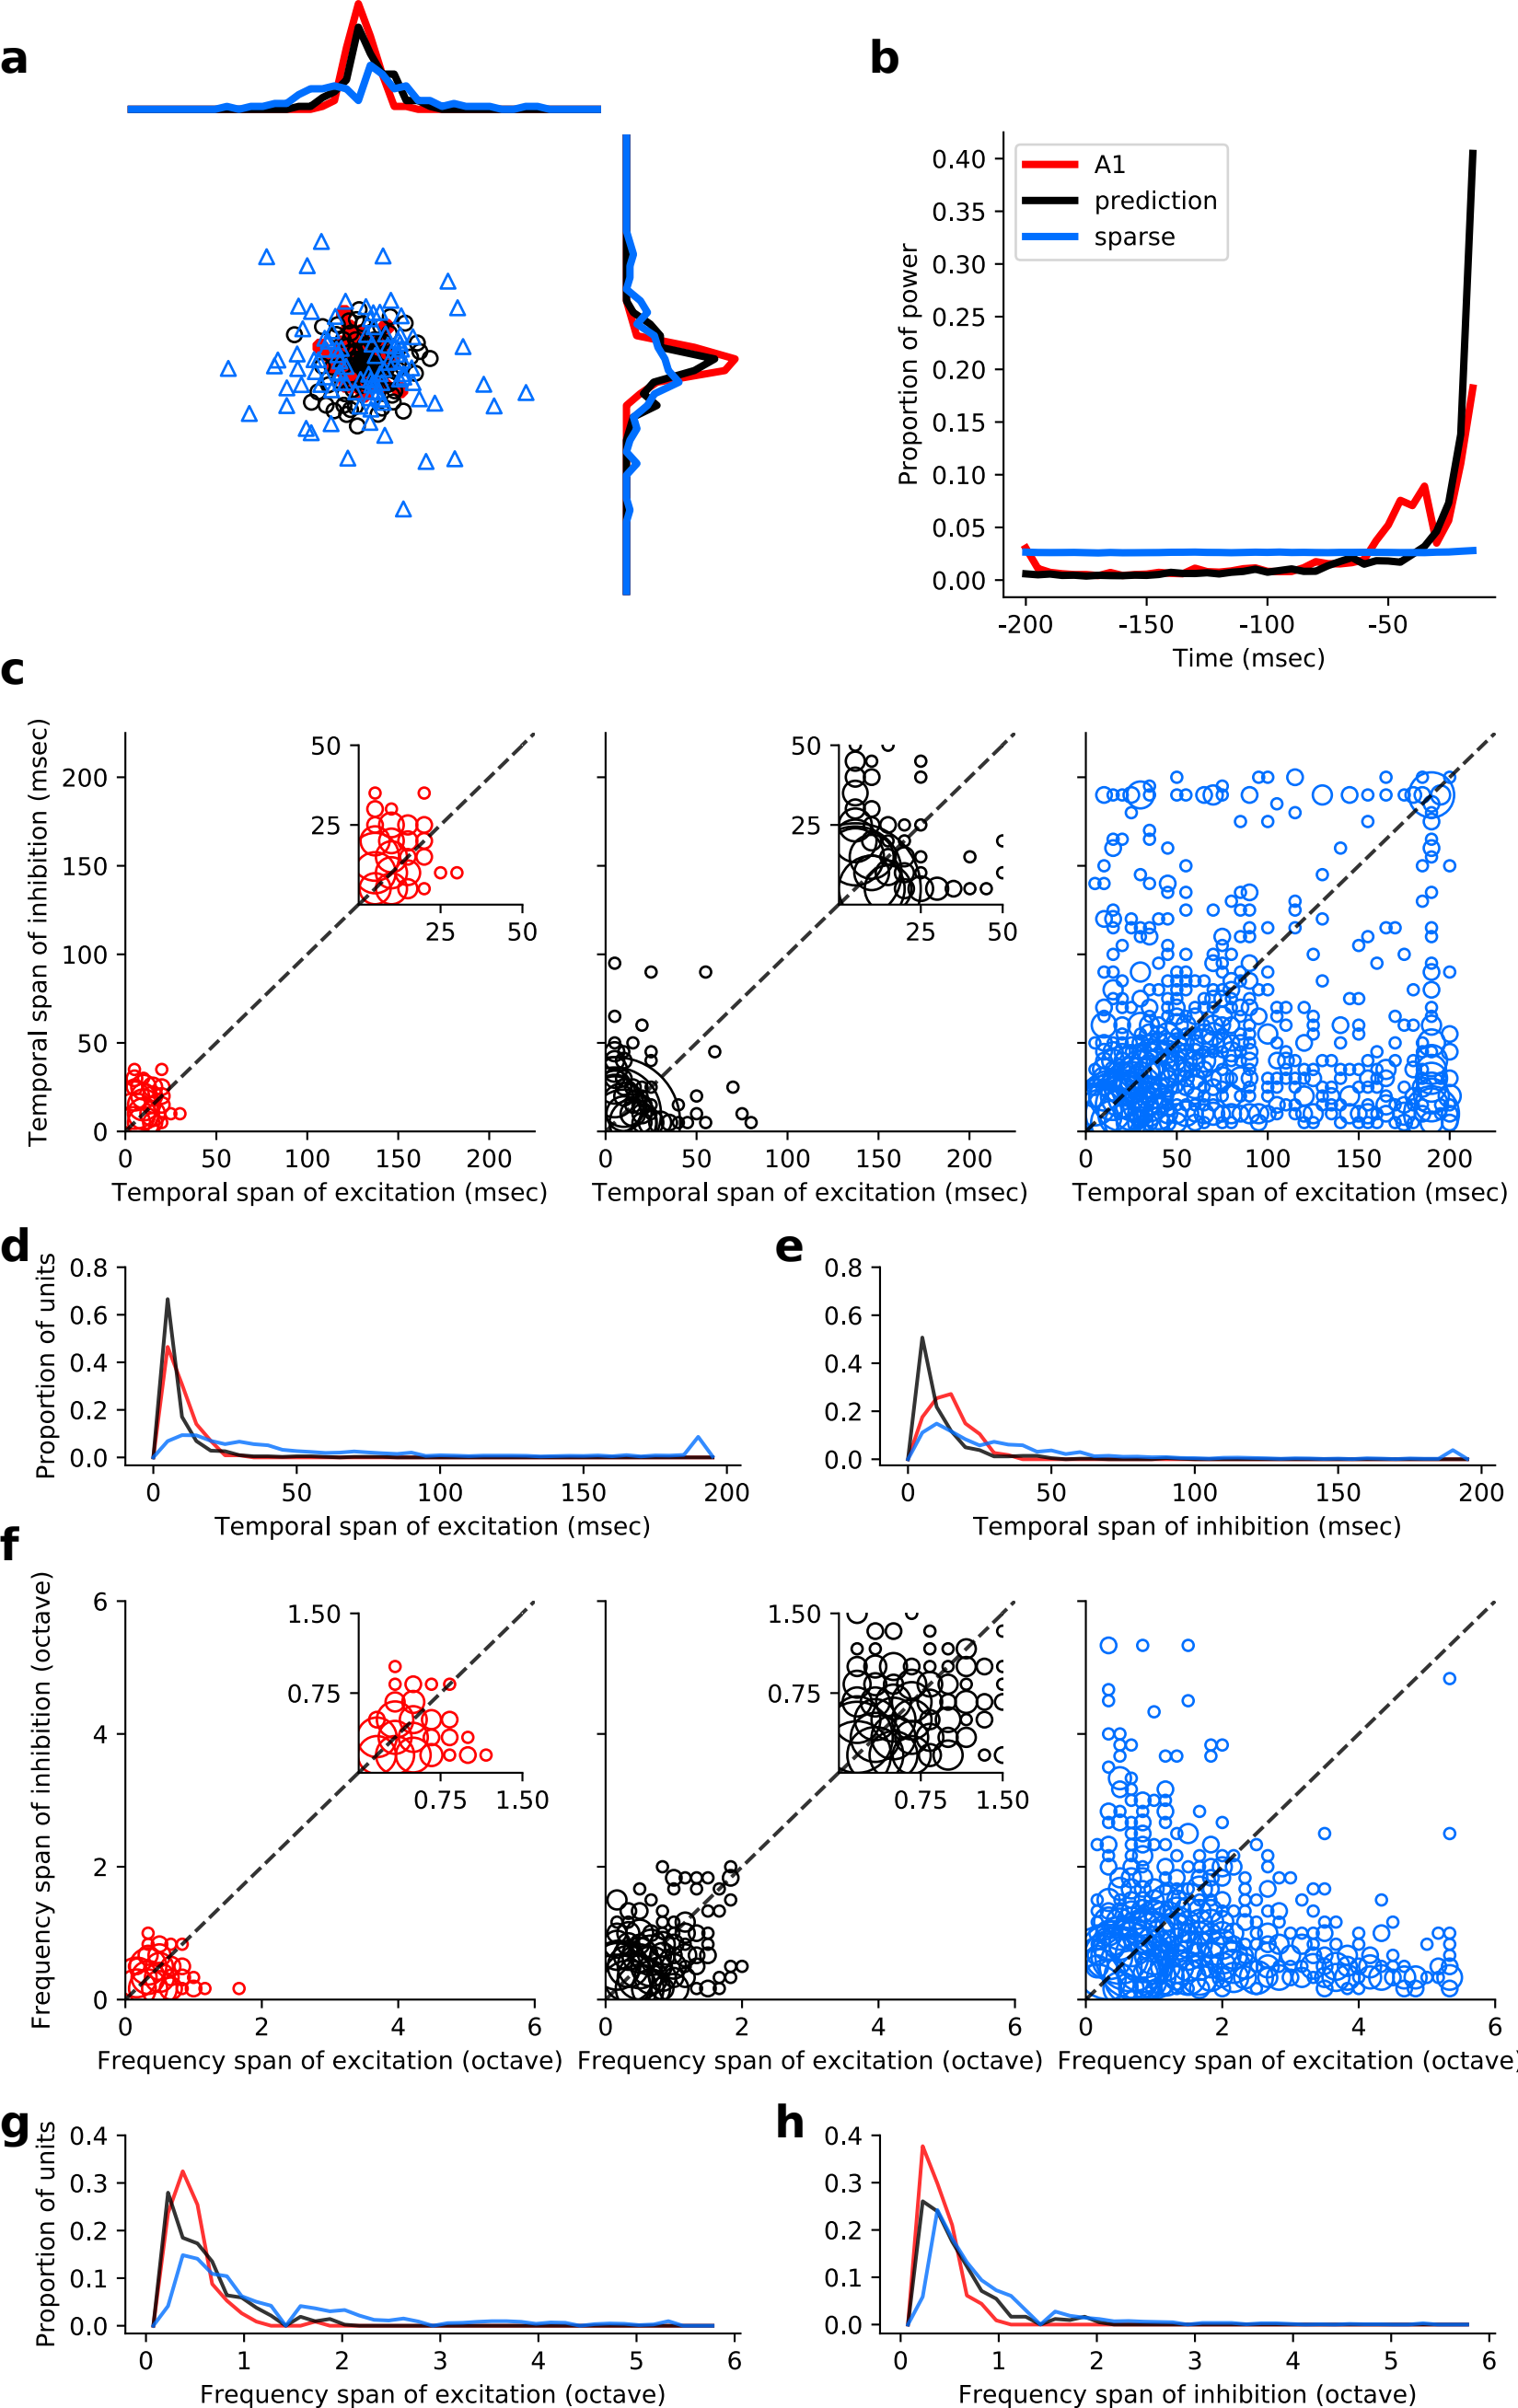

Supplement: supp [file elife-31557-supp-v1.zip]

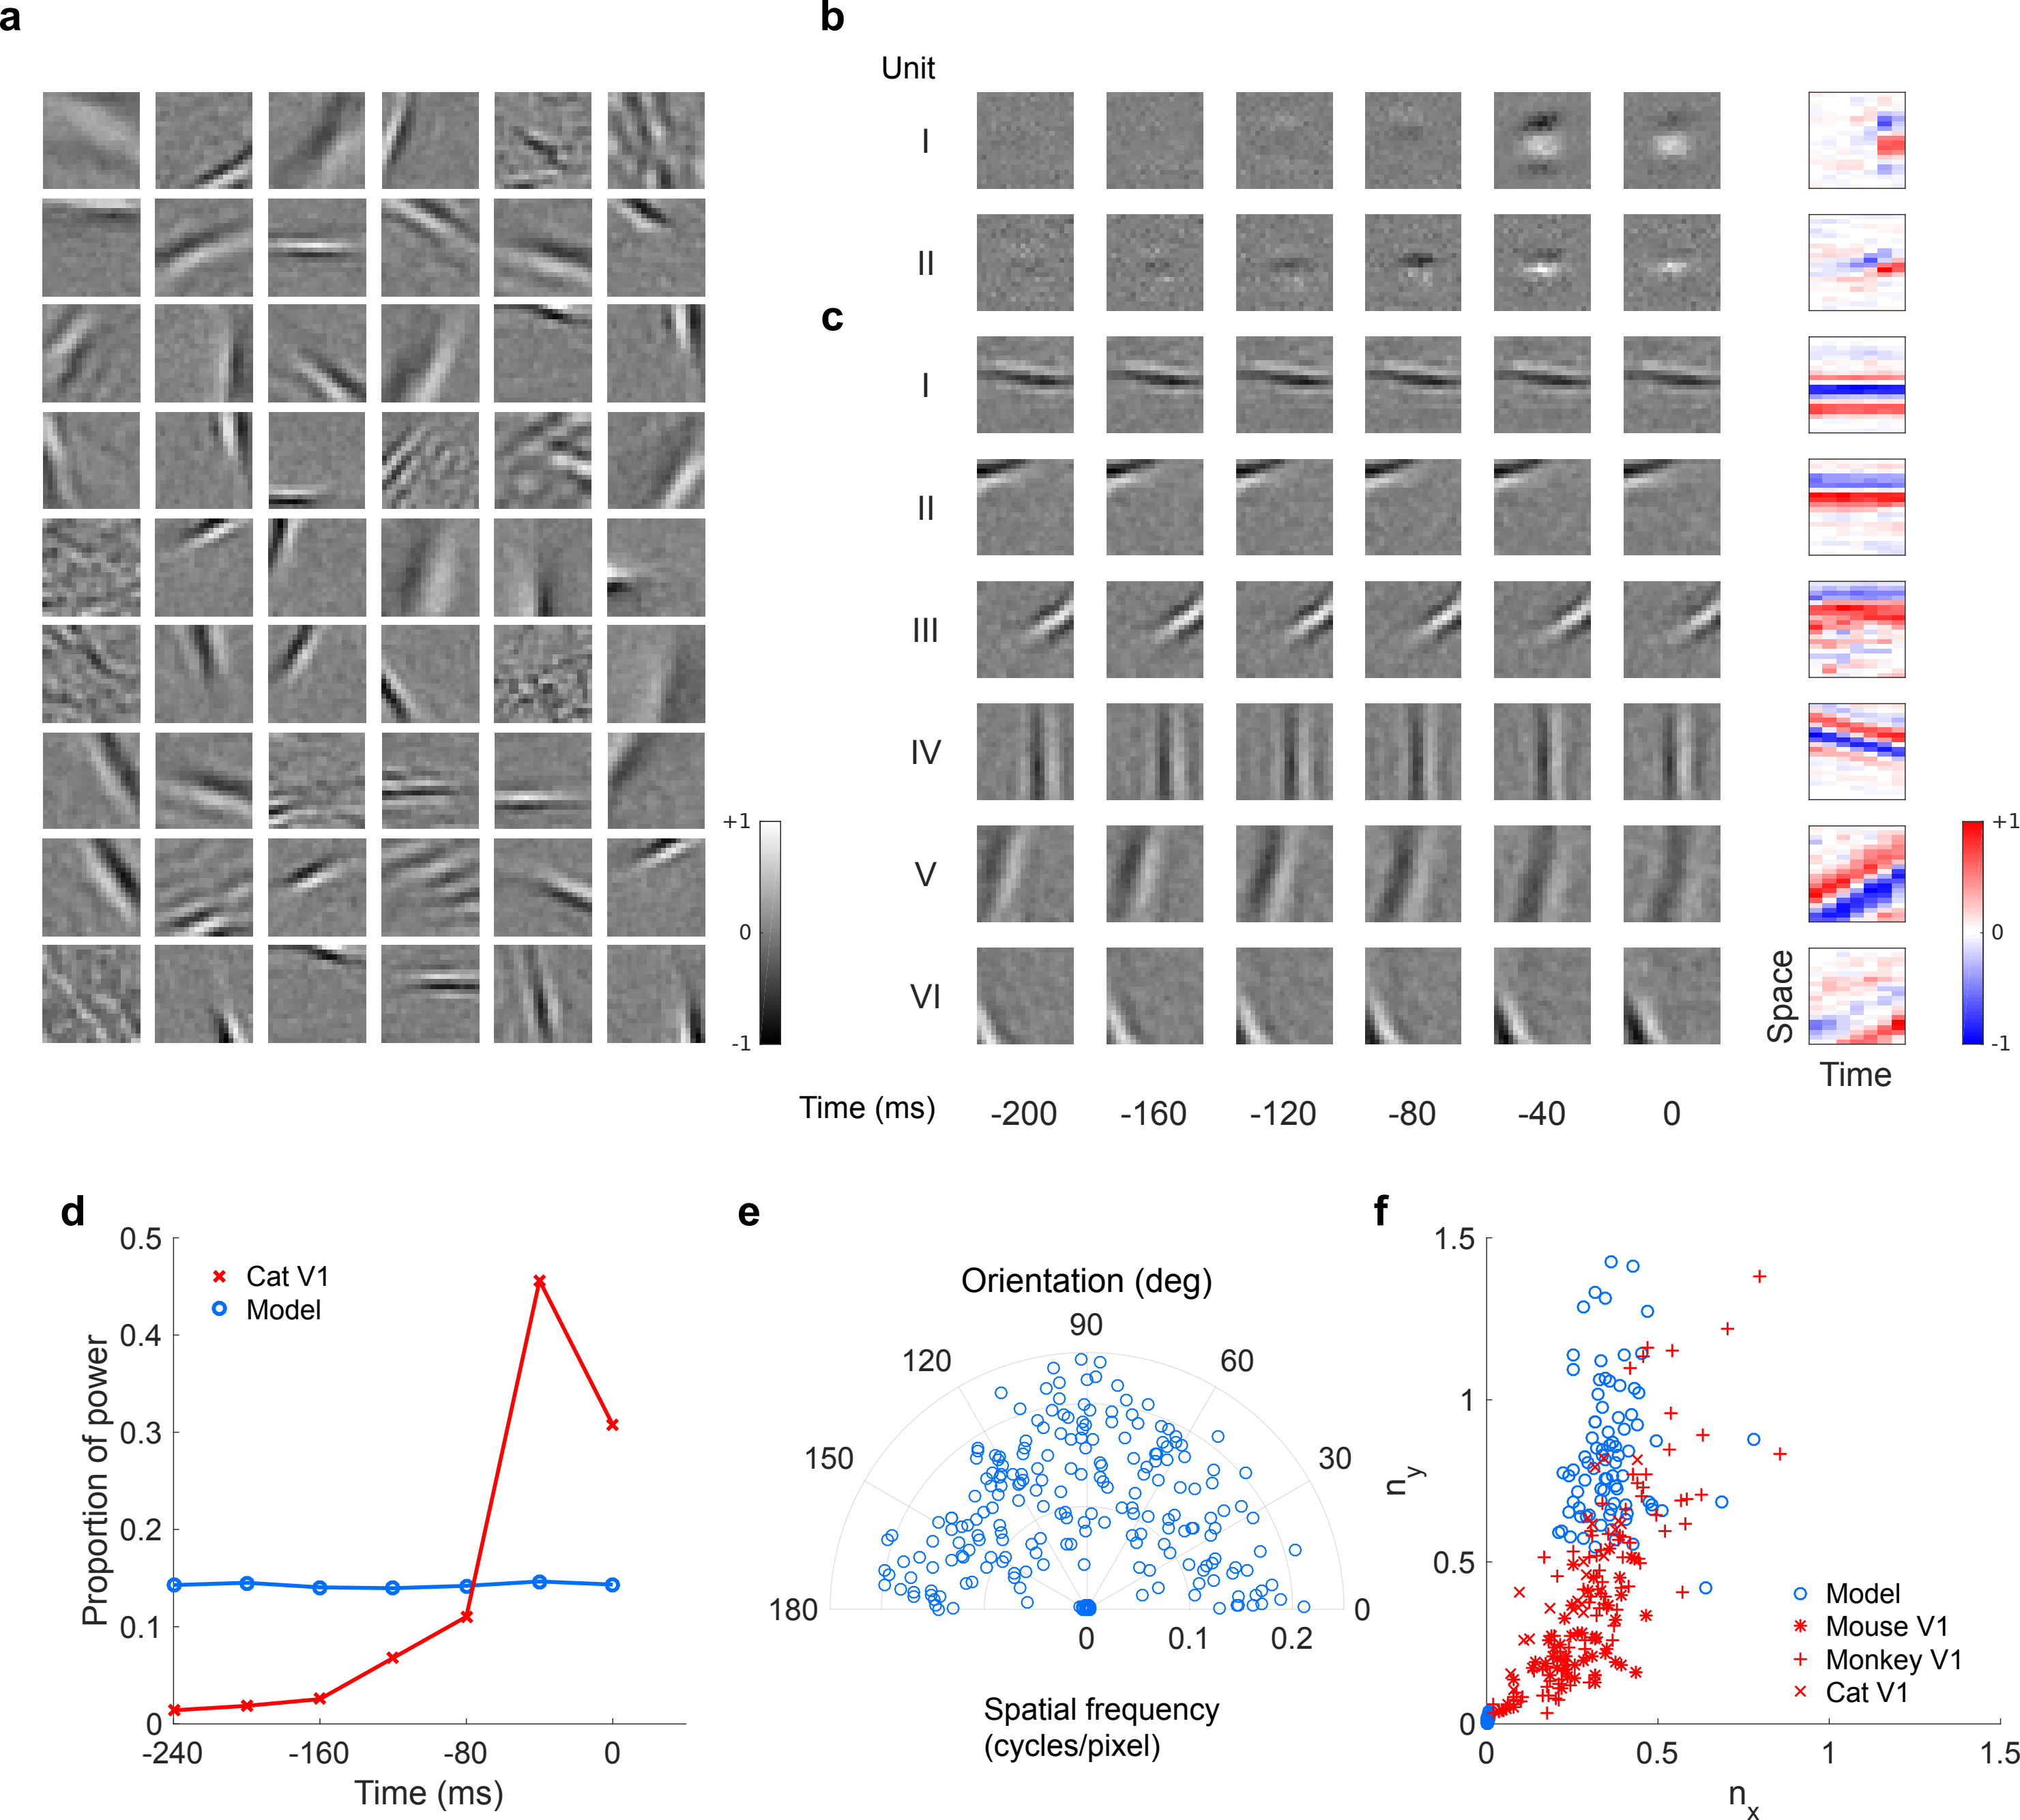

Supplement: supp [file elife-31557-supp-v1.zip]

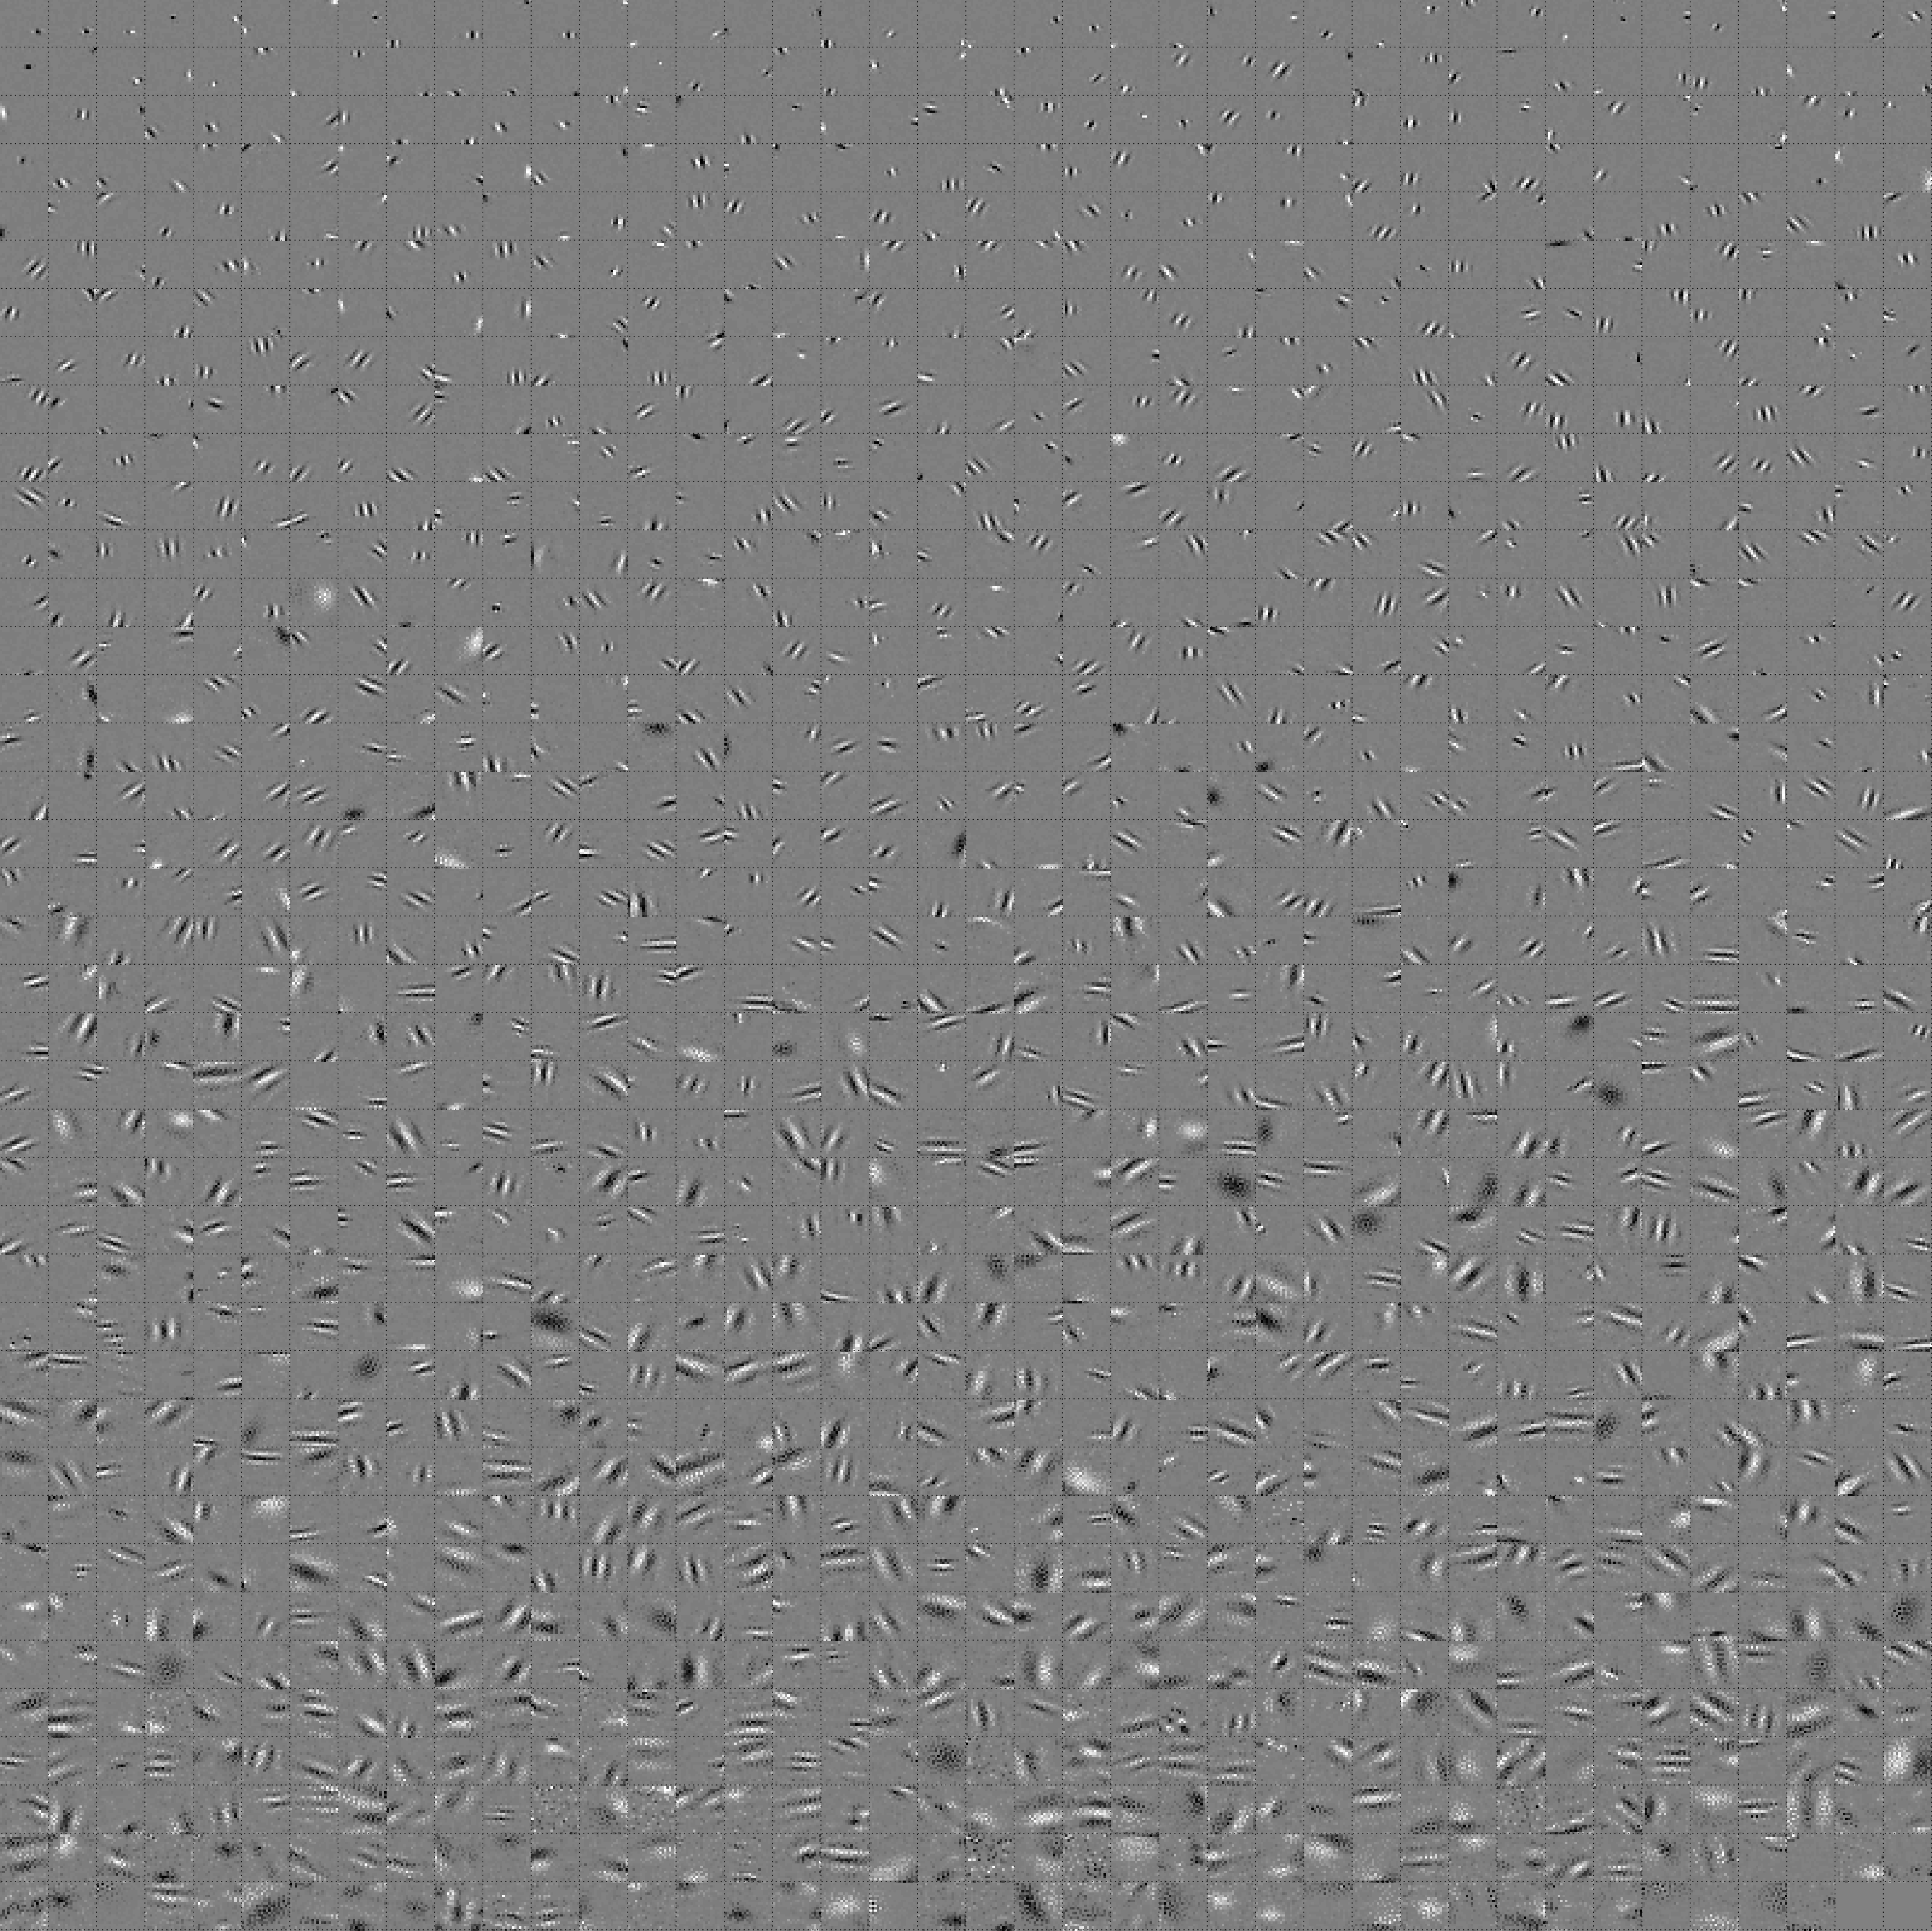

Supplement: supp [file elife-31557-supp-v1.zip]

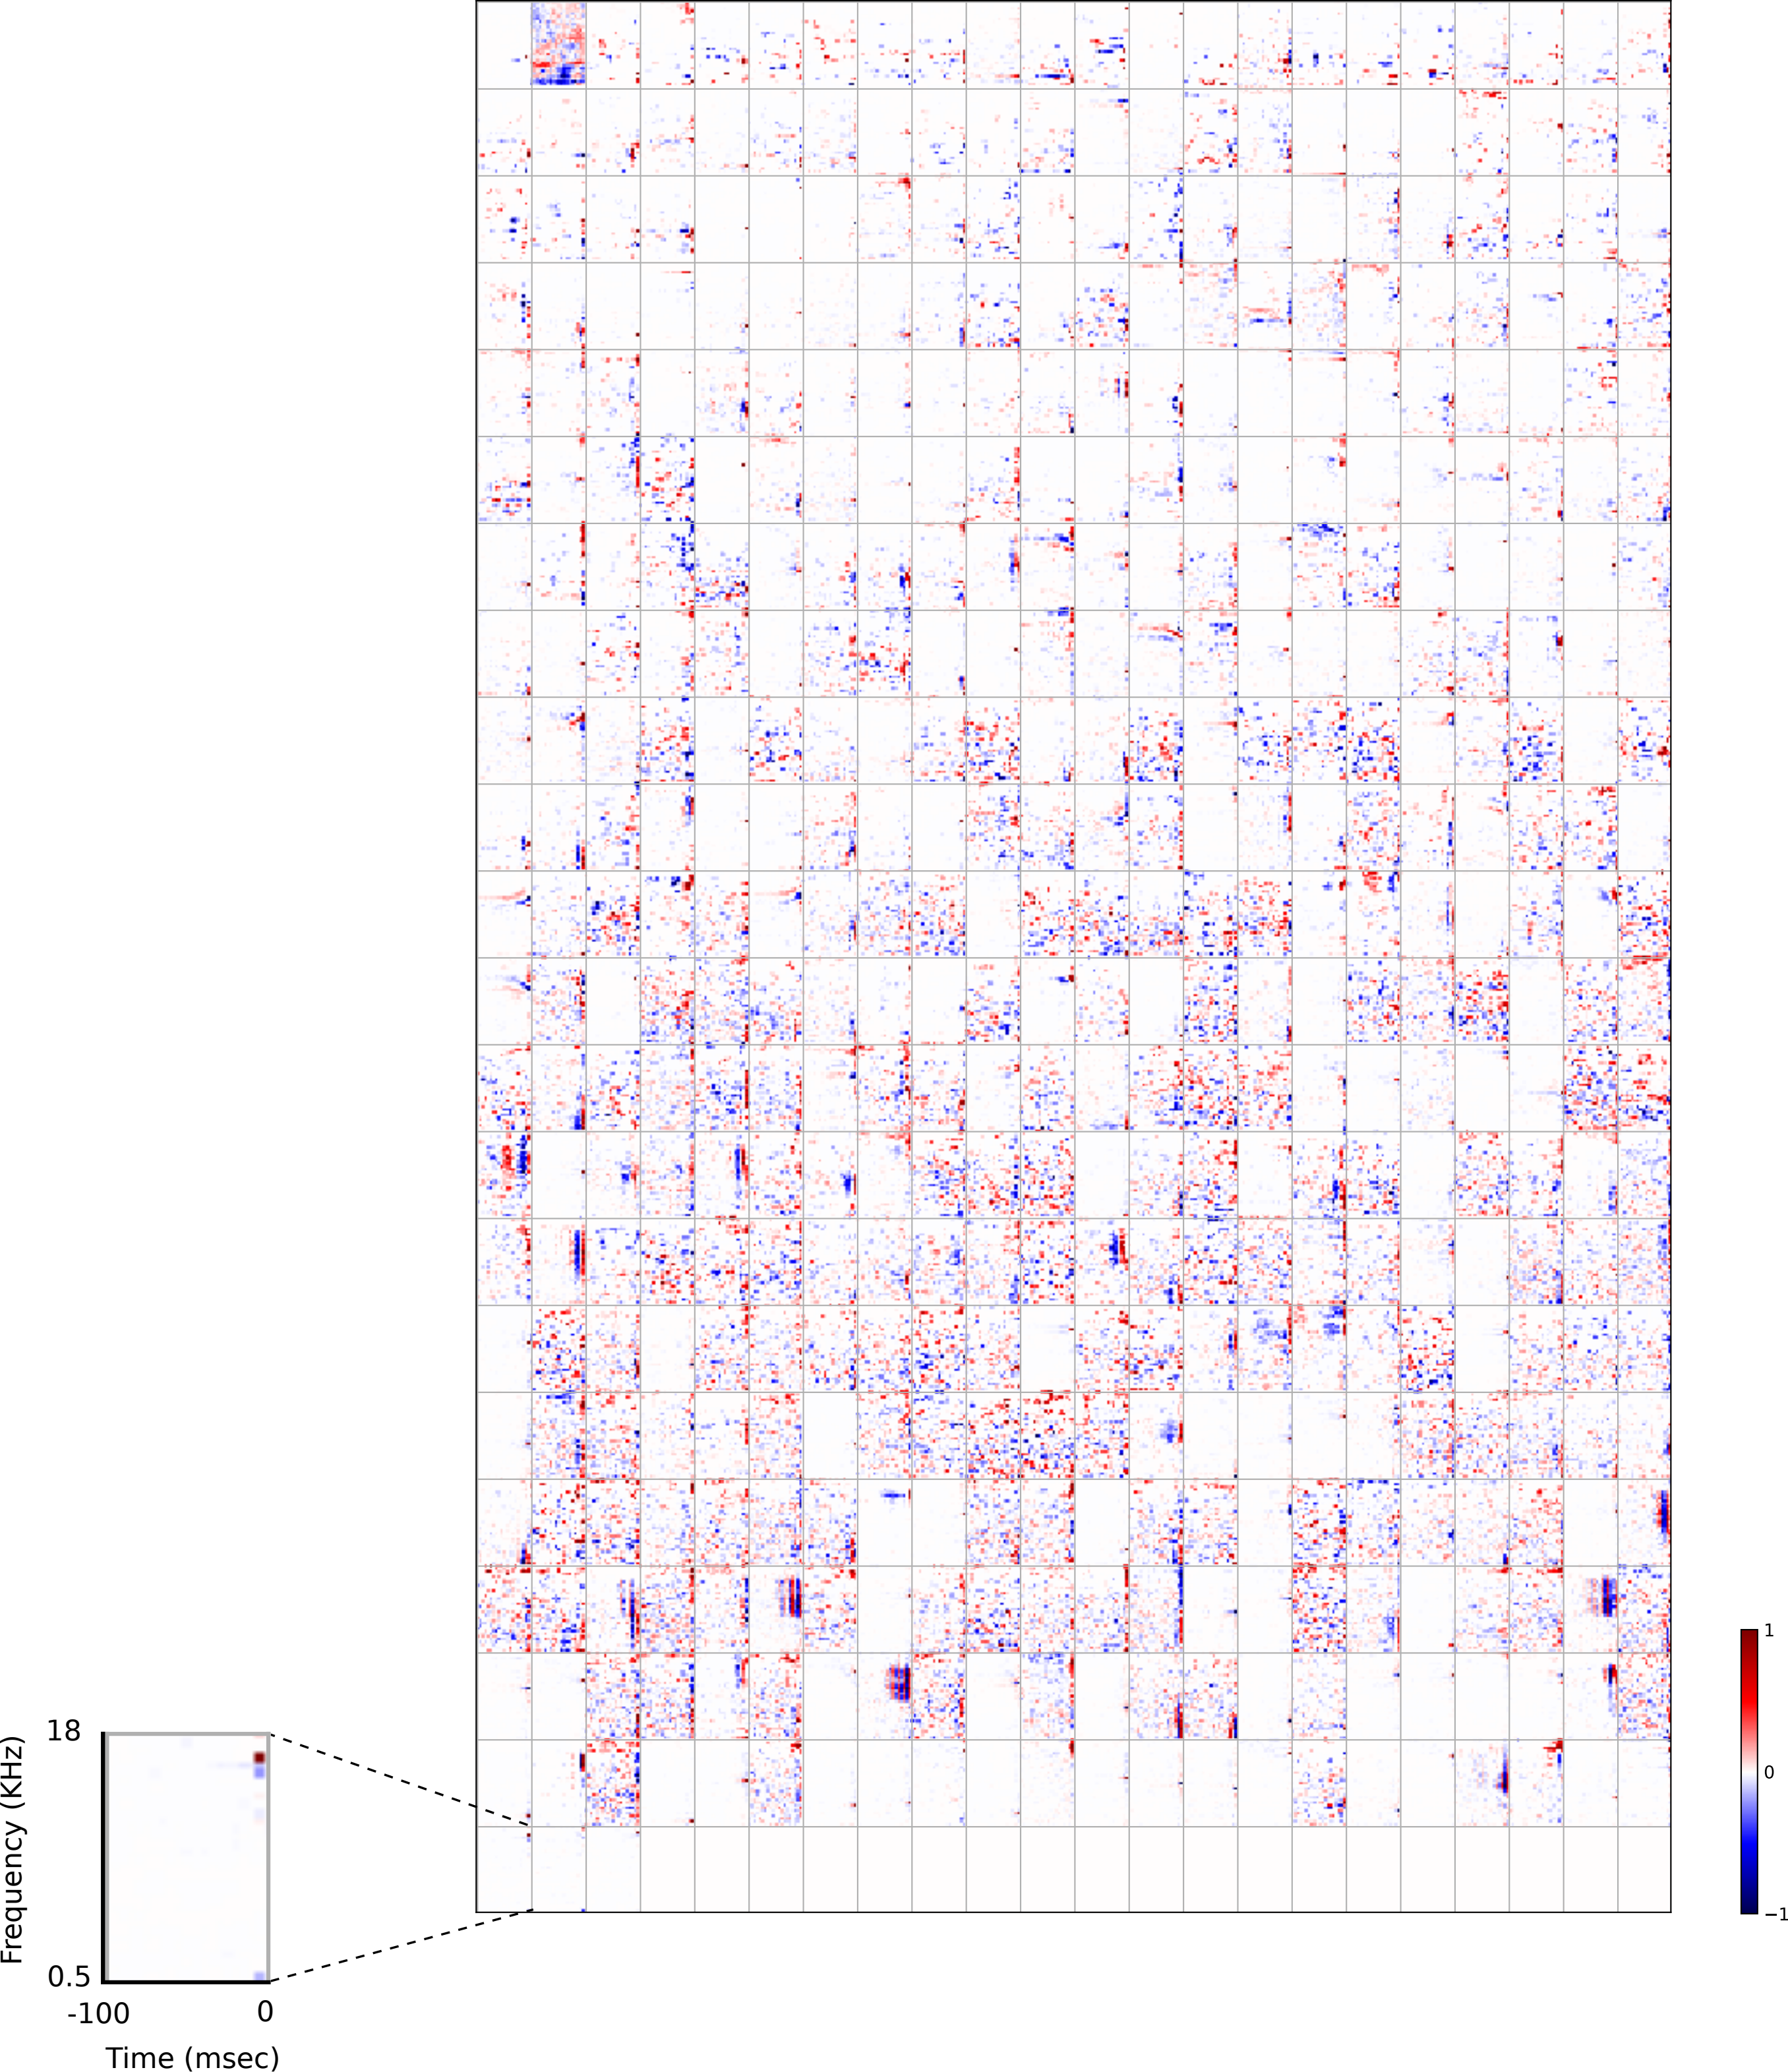

Supplement: supp [file elife-31557-supp-v1.zip]

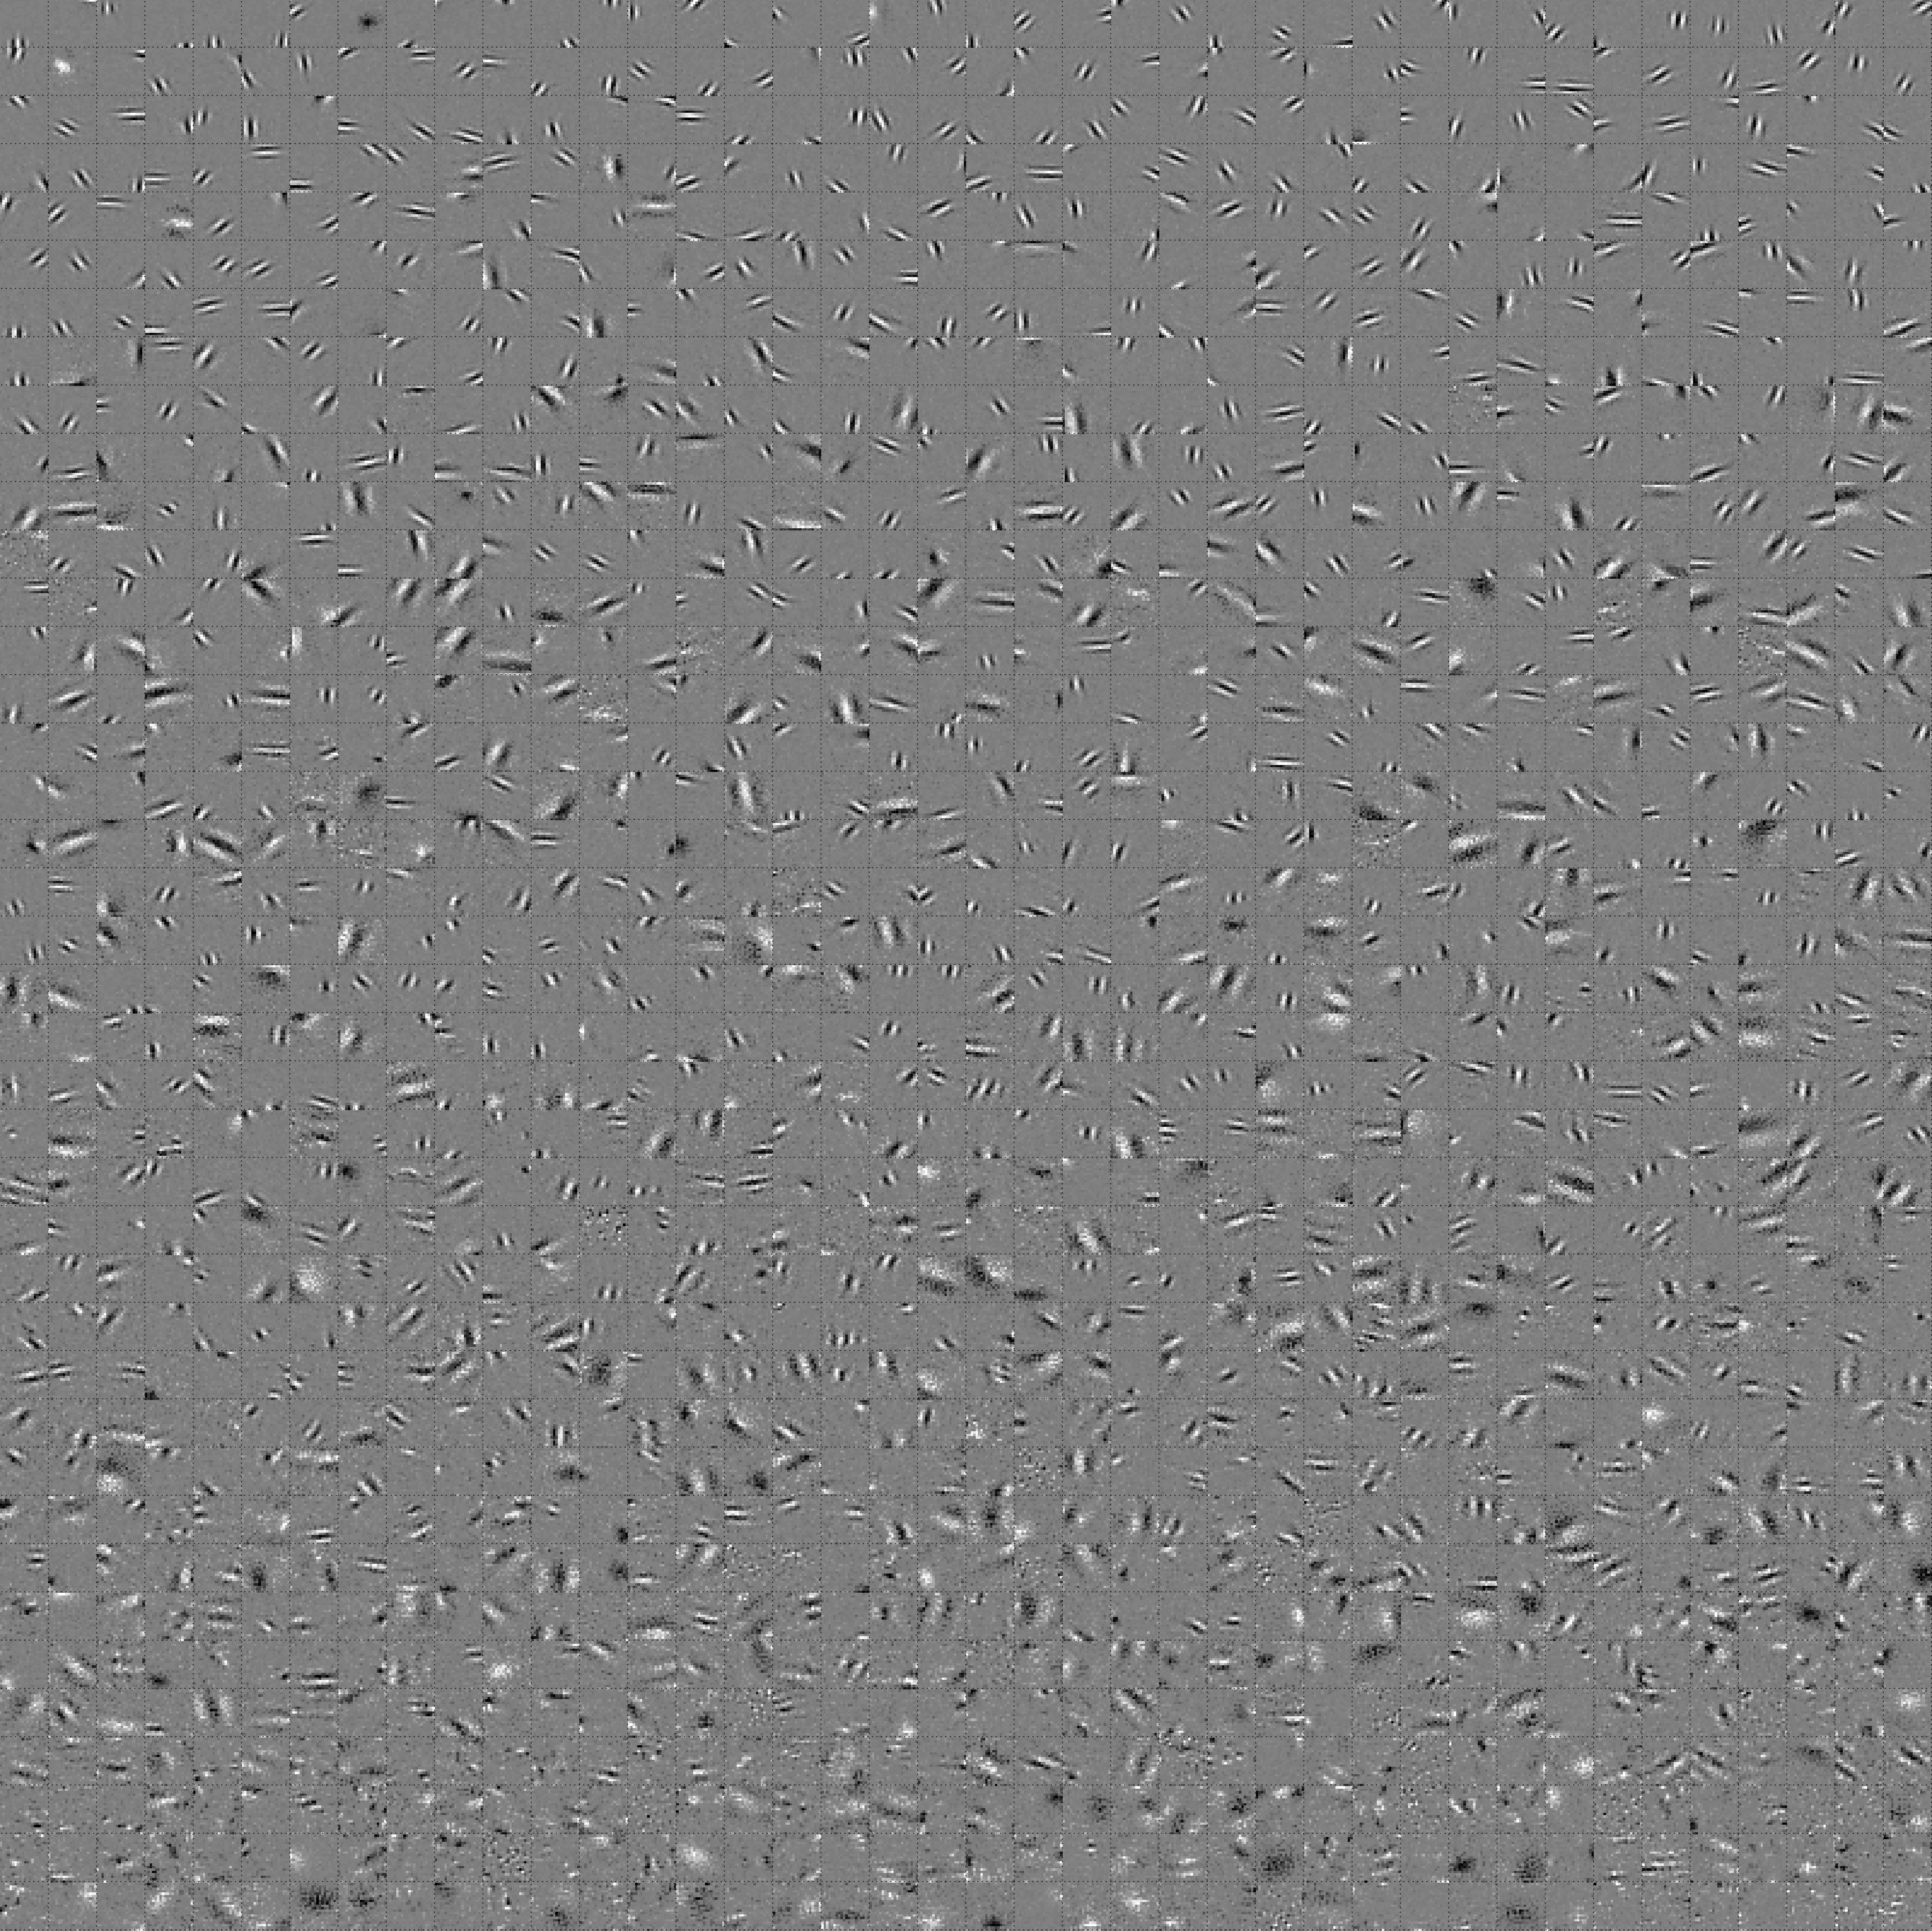

Supplement: supp [file elife-31557-supp-v1.zip]

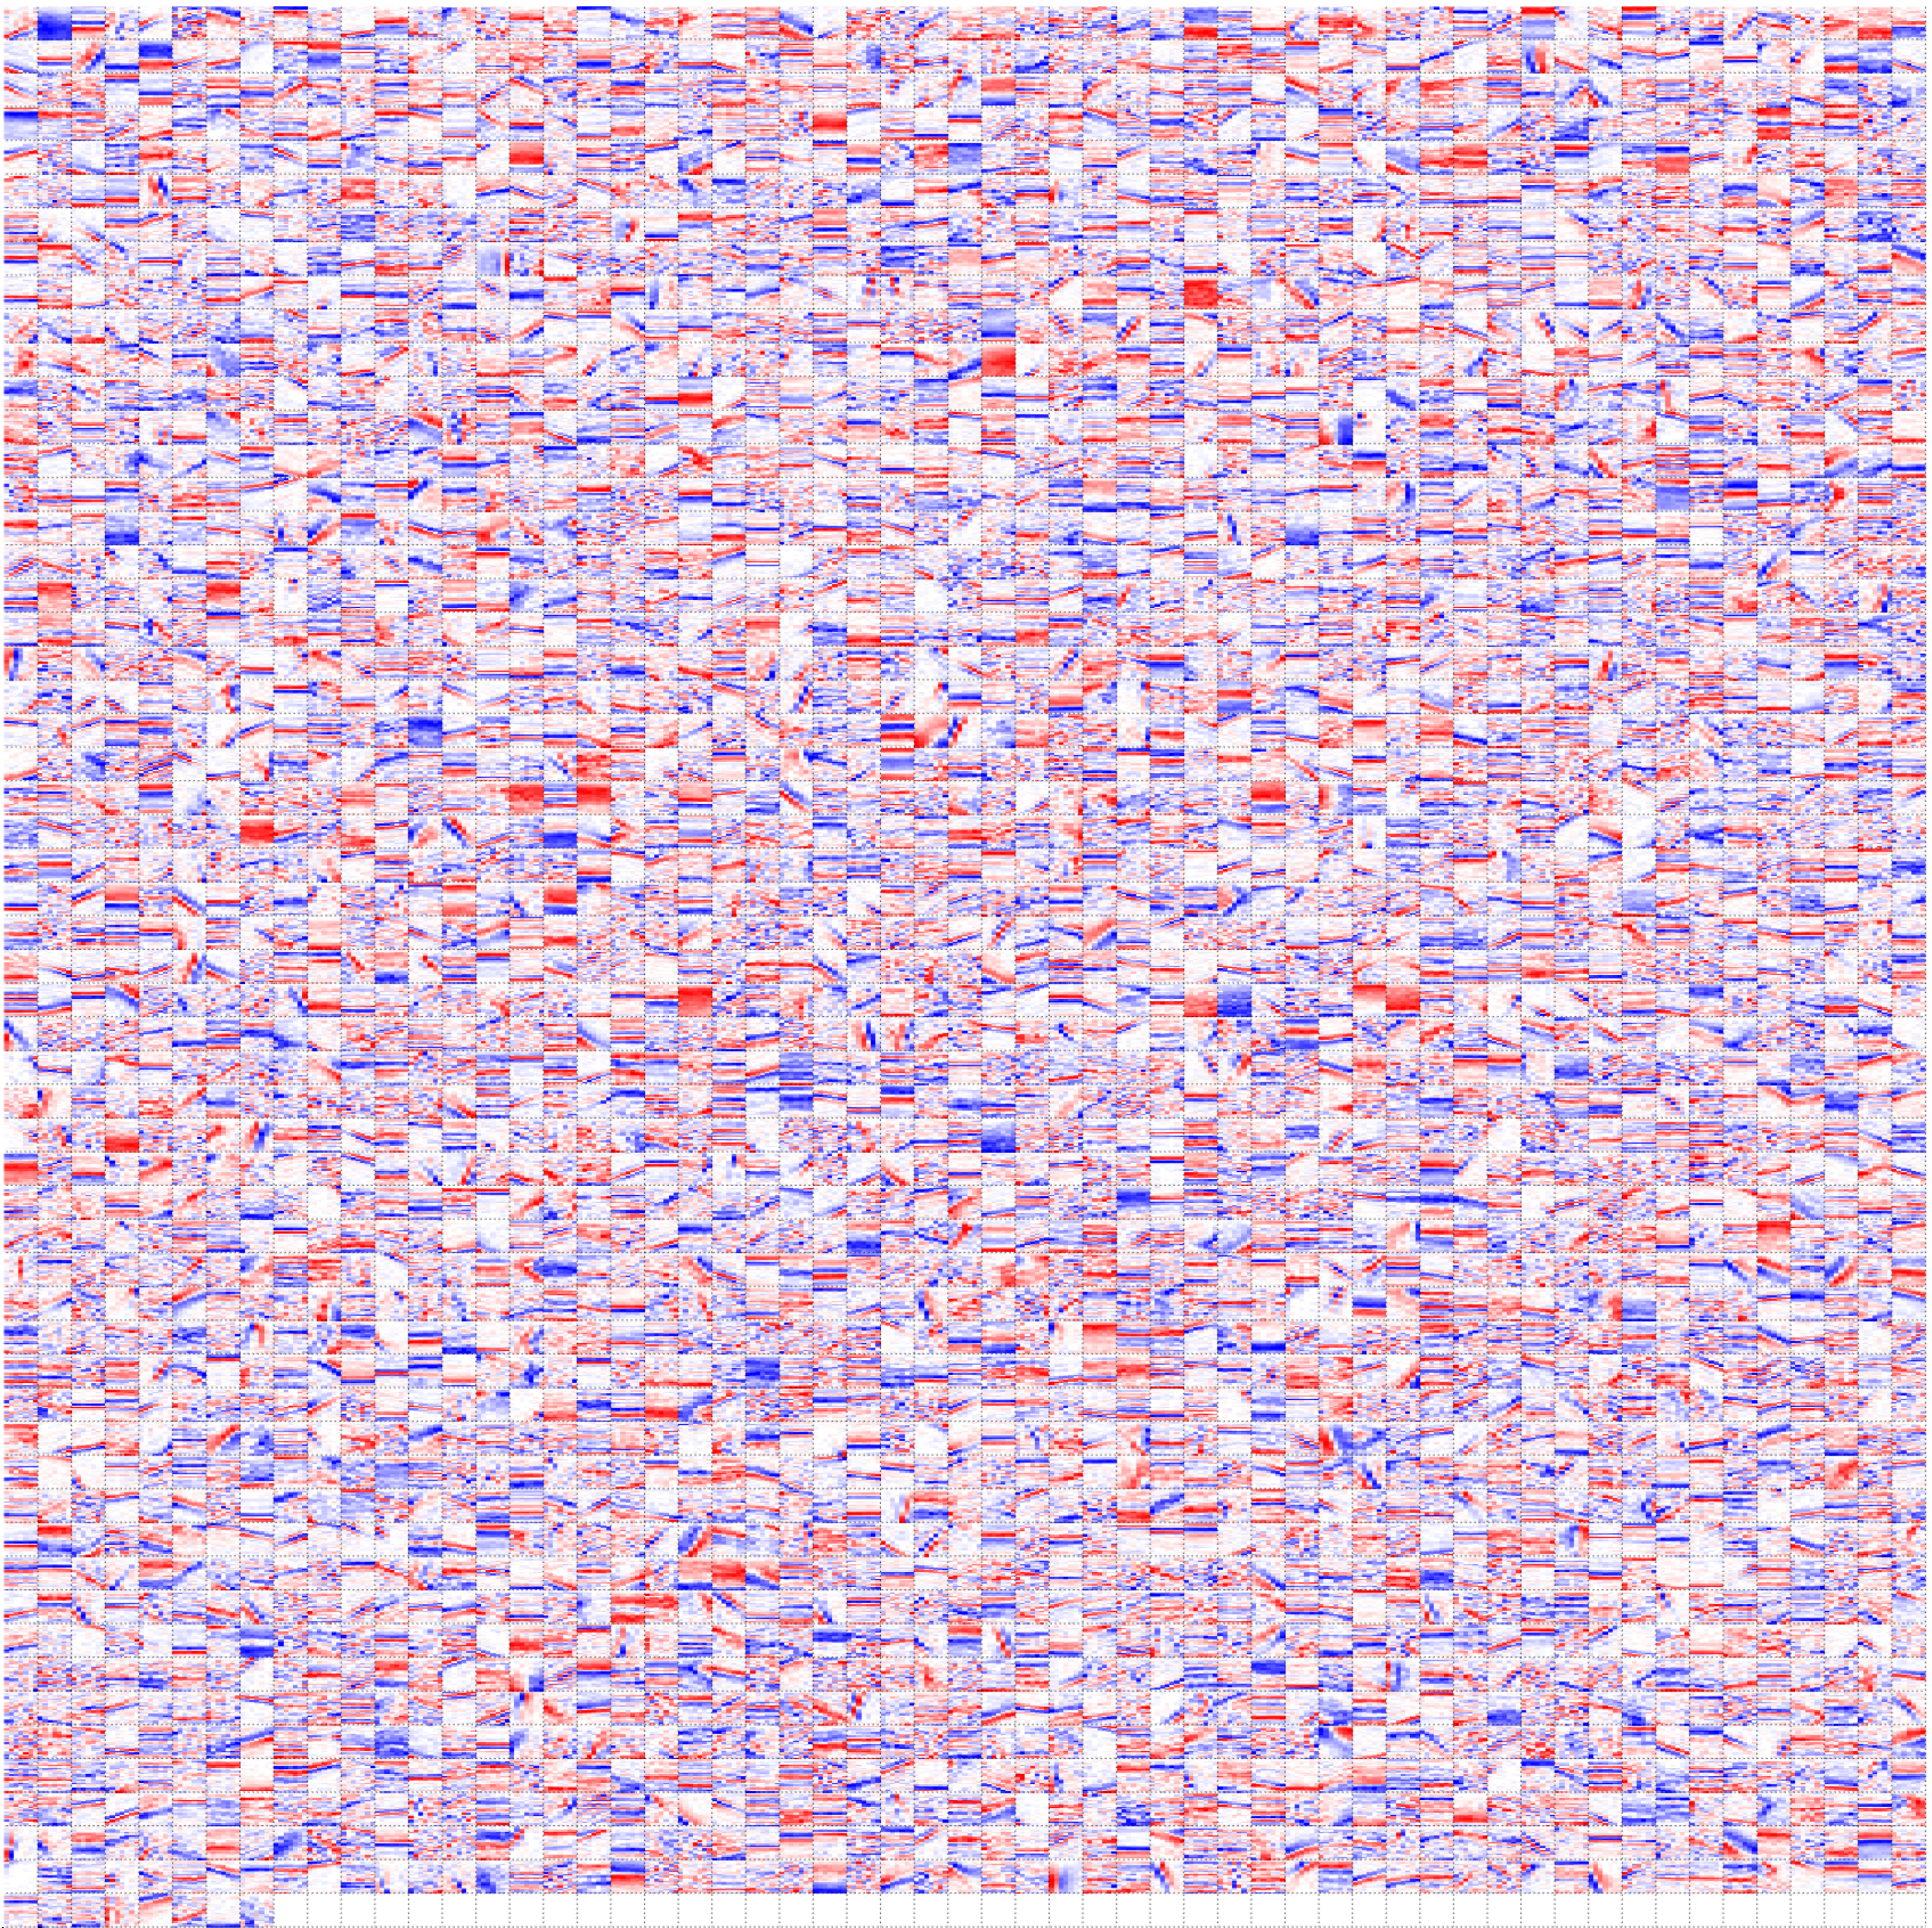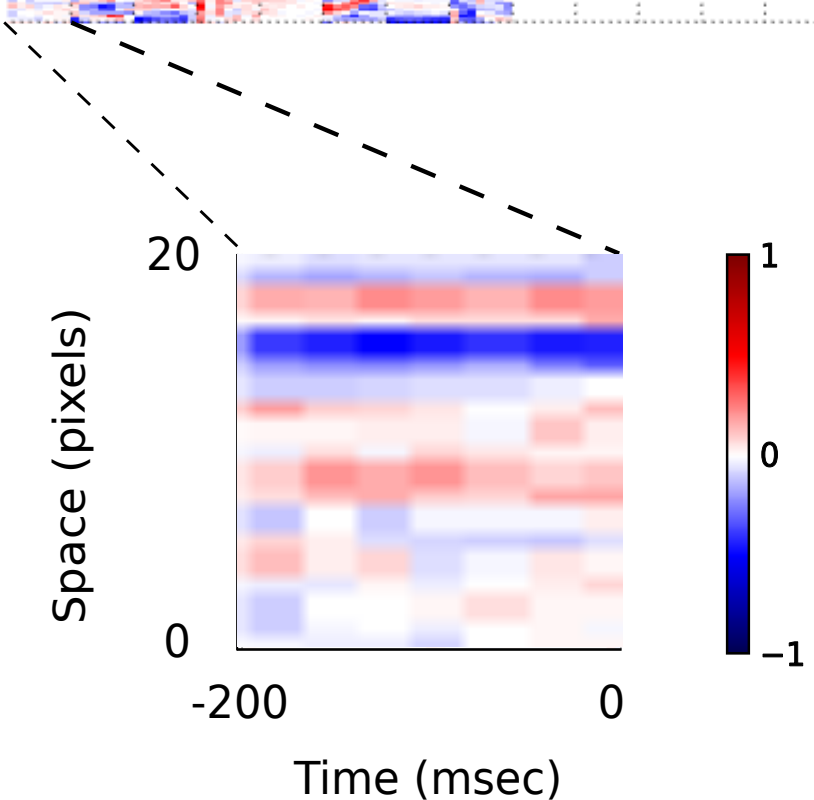

Supplement: supp [file elife-31557-supp-v1.zip]

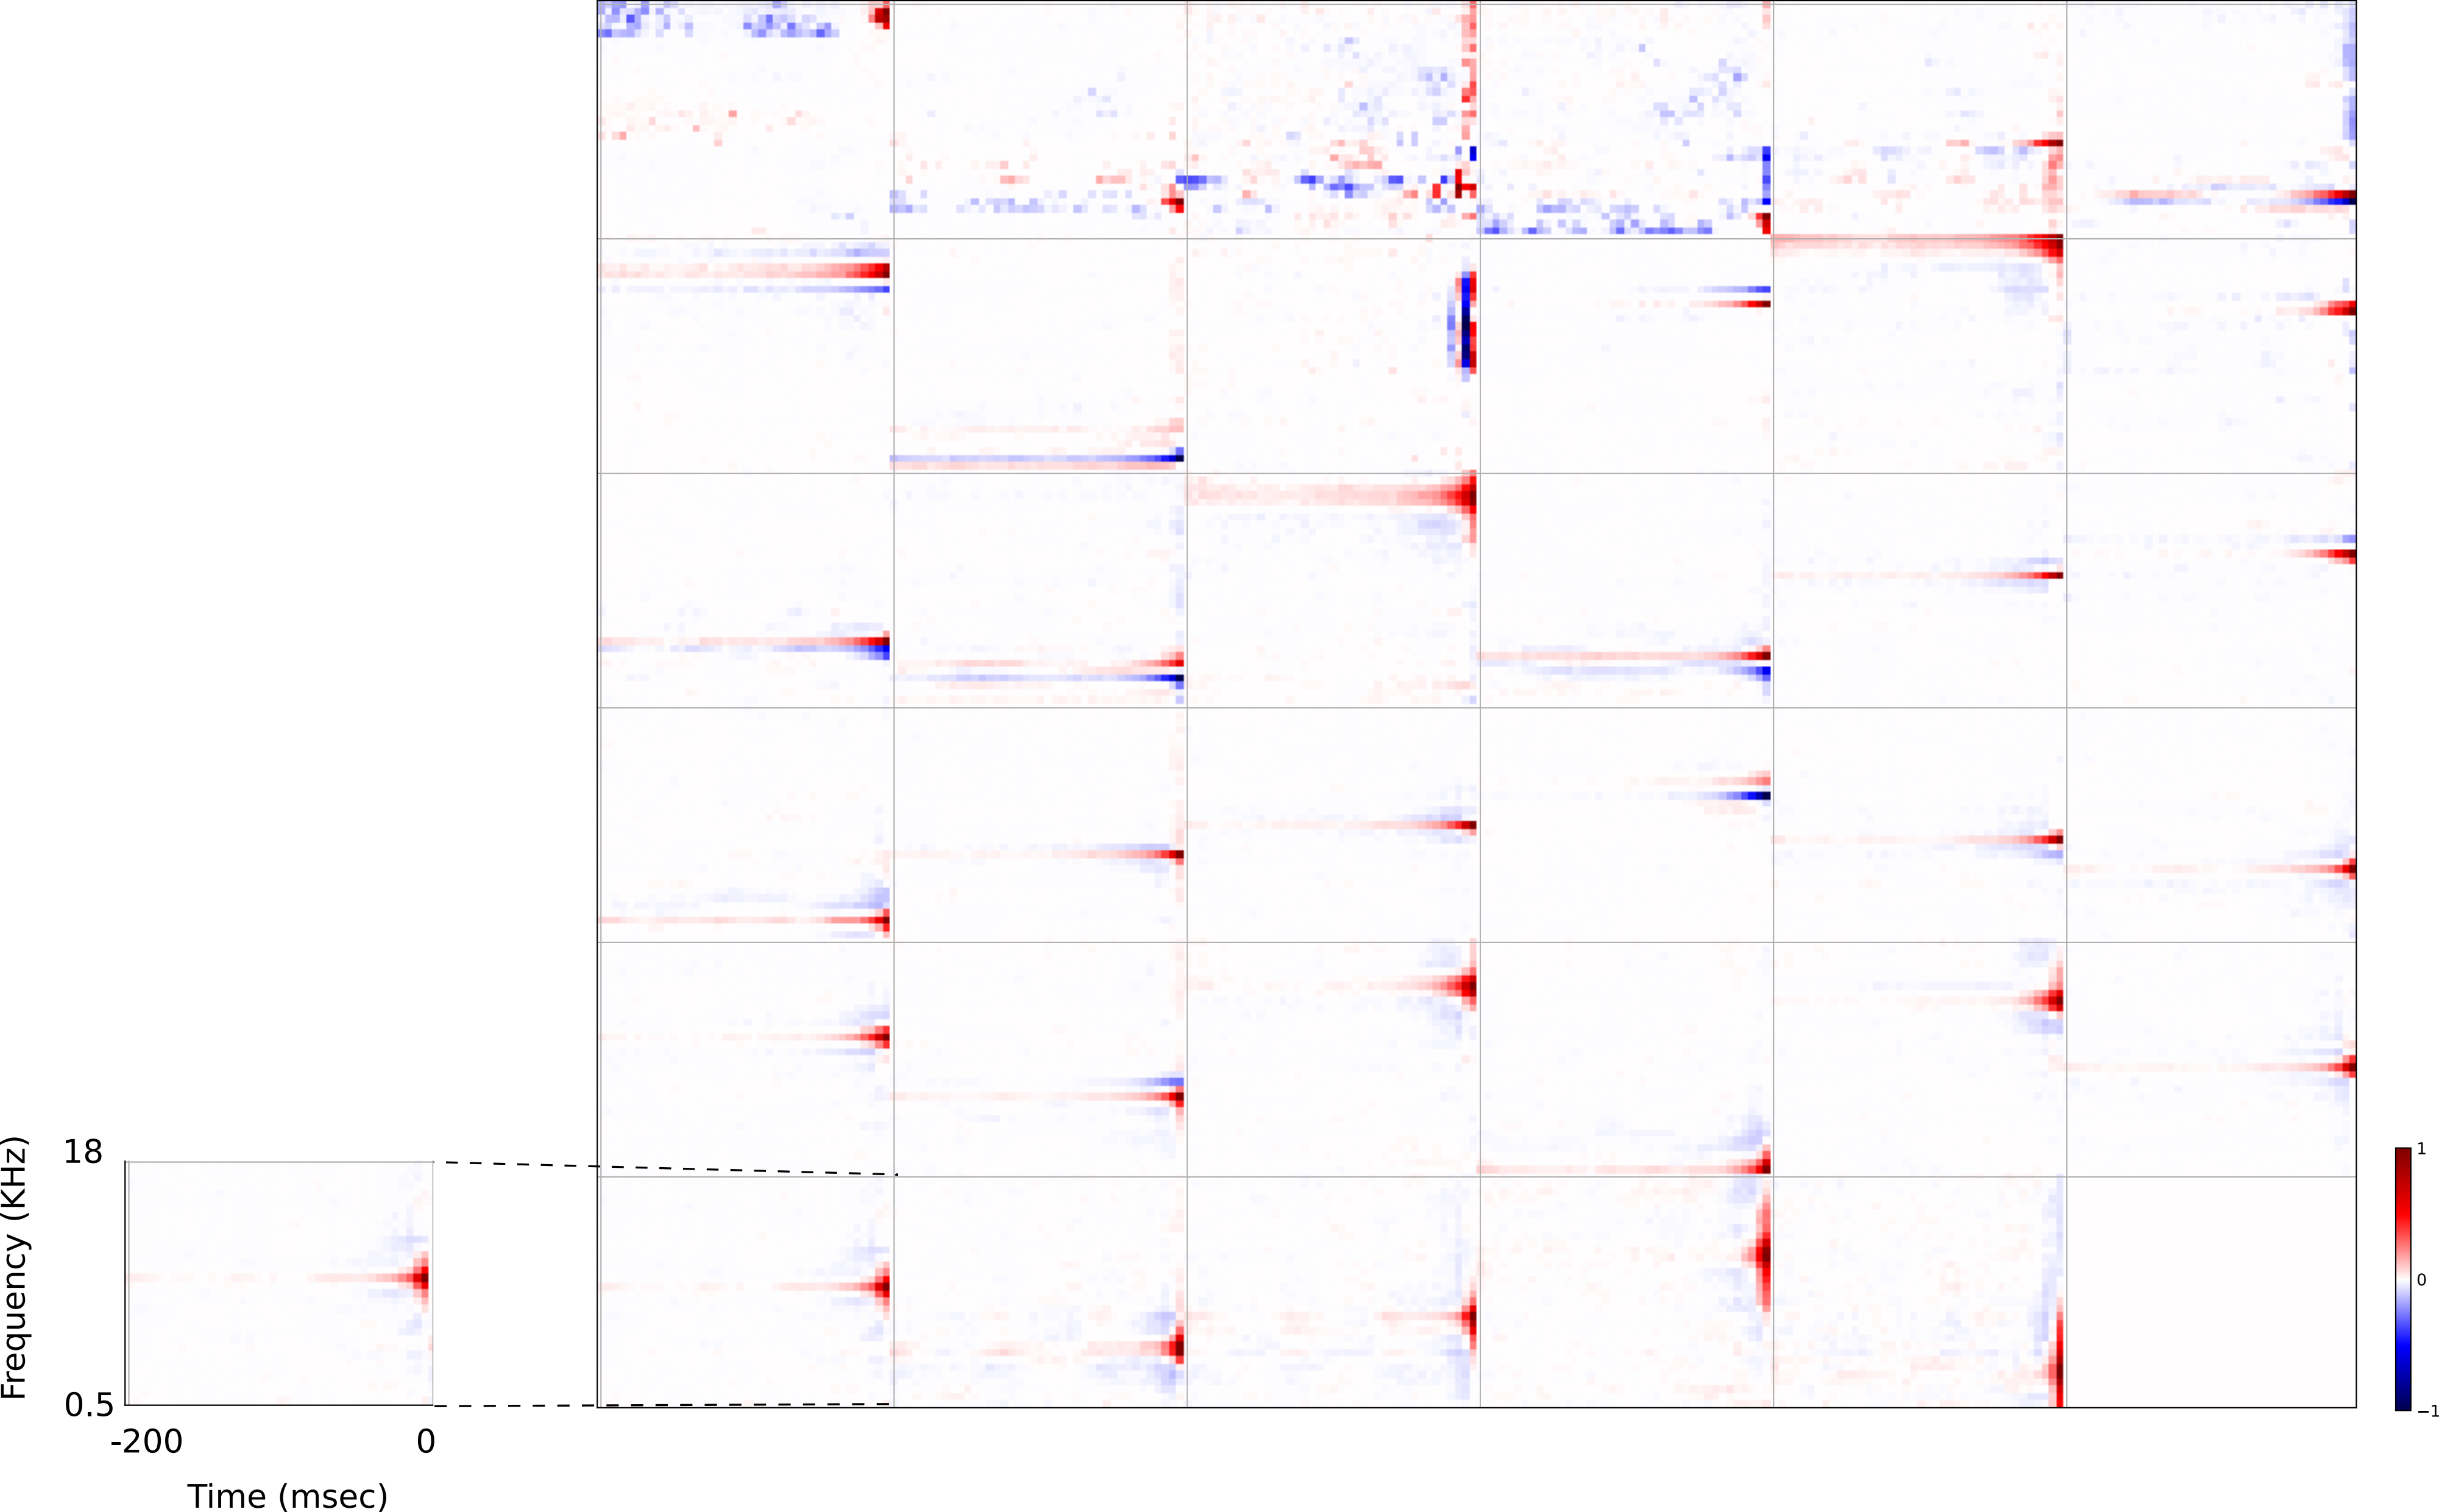

Supplement: supp [file elife-31557-supp-v1.zip]

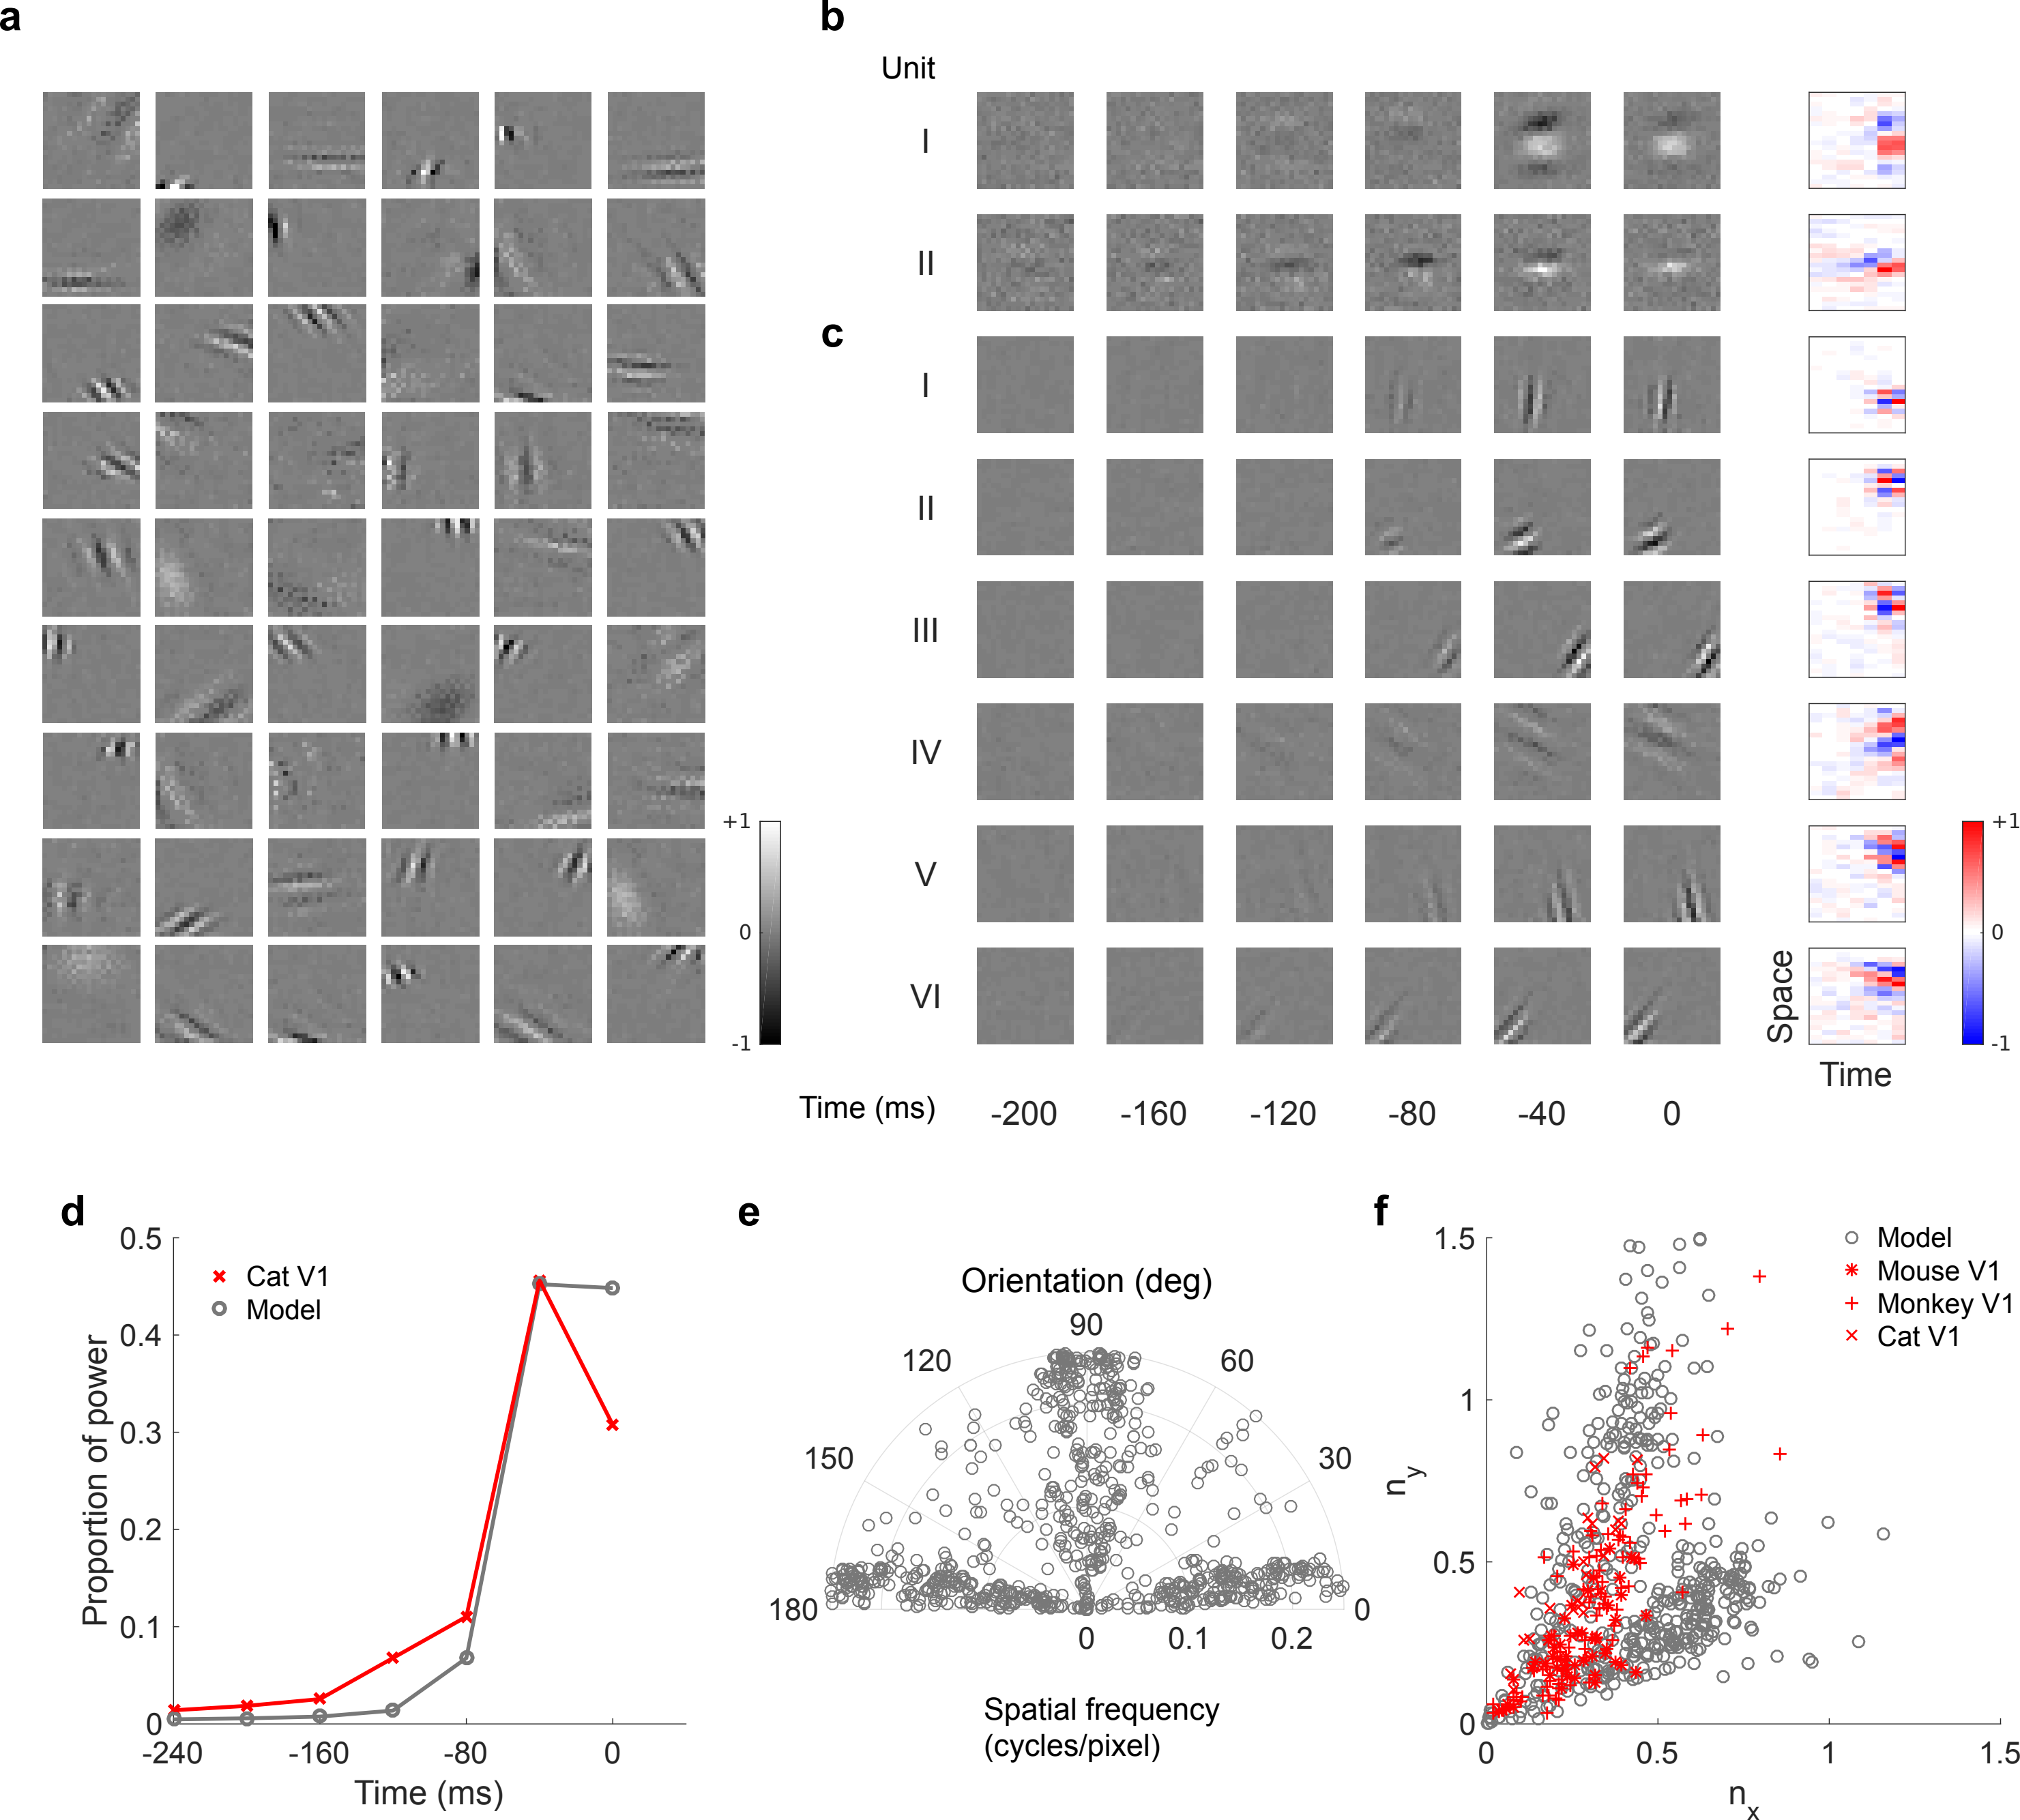

Supplement: supp [file elife-31557-supp-v1.zip]

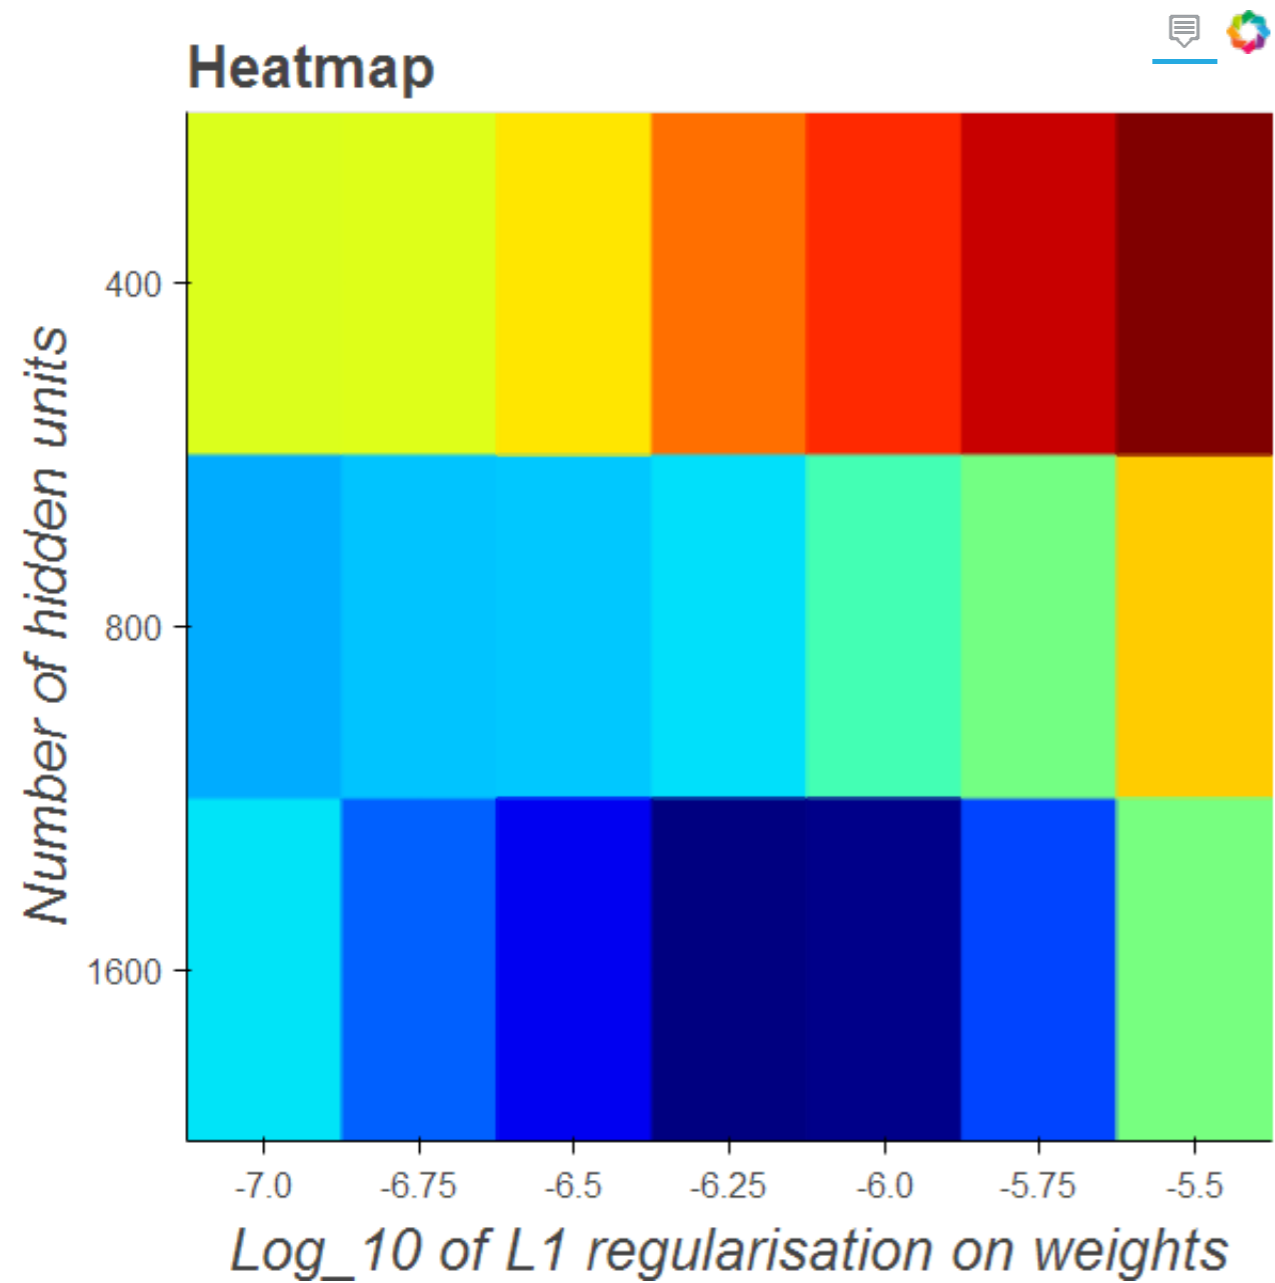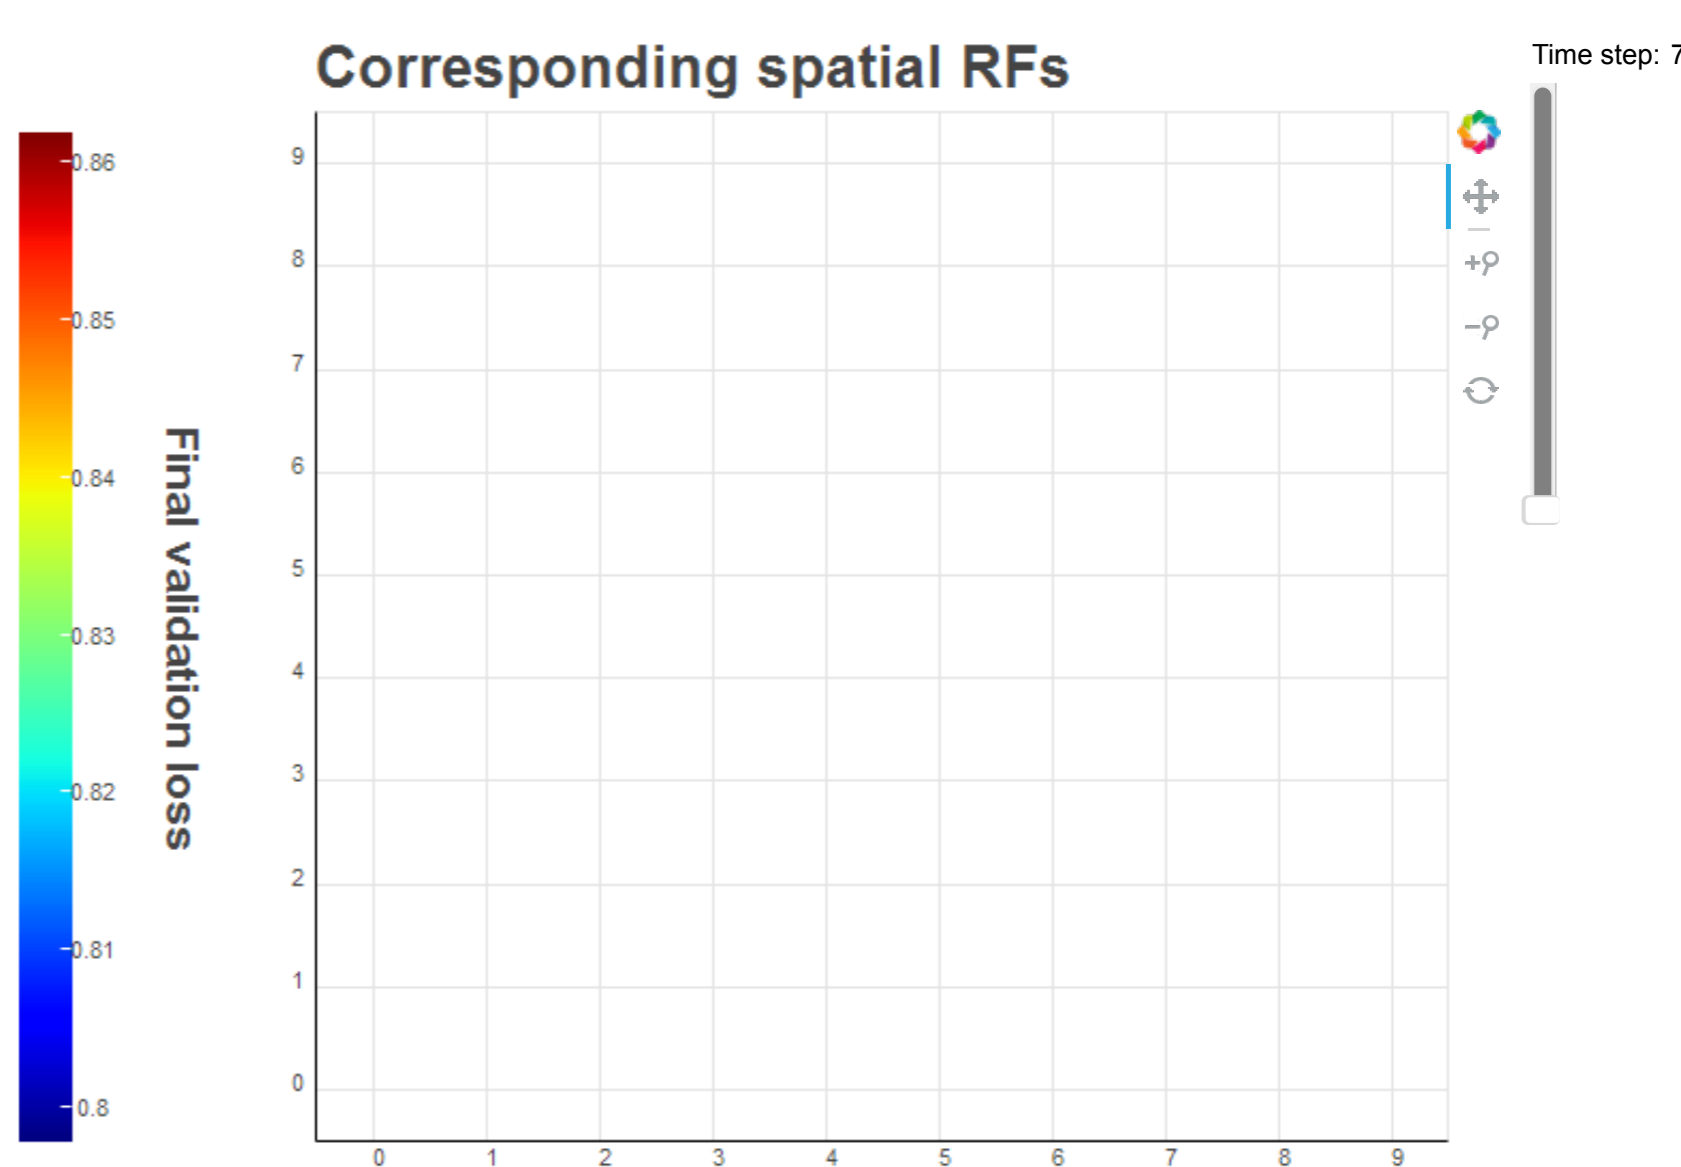

Supplement: supp [file elife-31557-supp-v1.zip › elife_poa_e31557_Figure_8_figure_supplement_3.pdf]

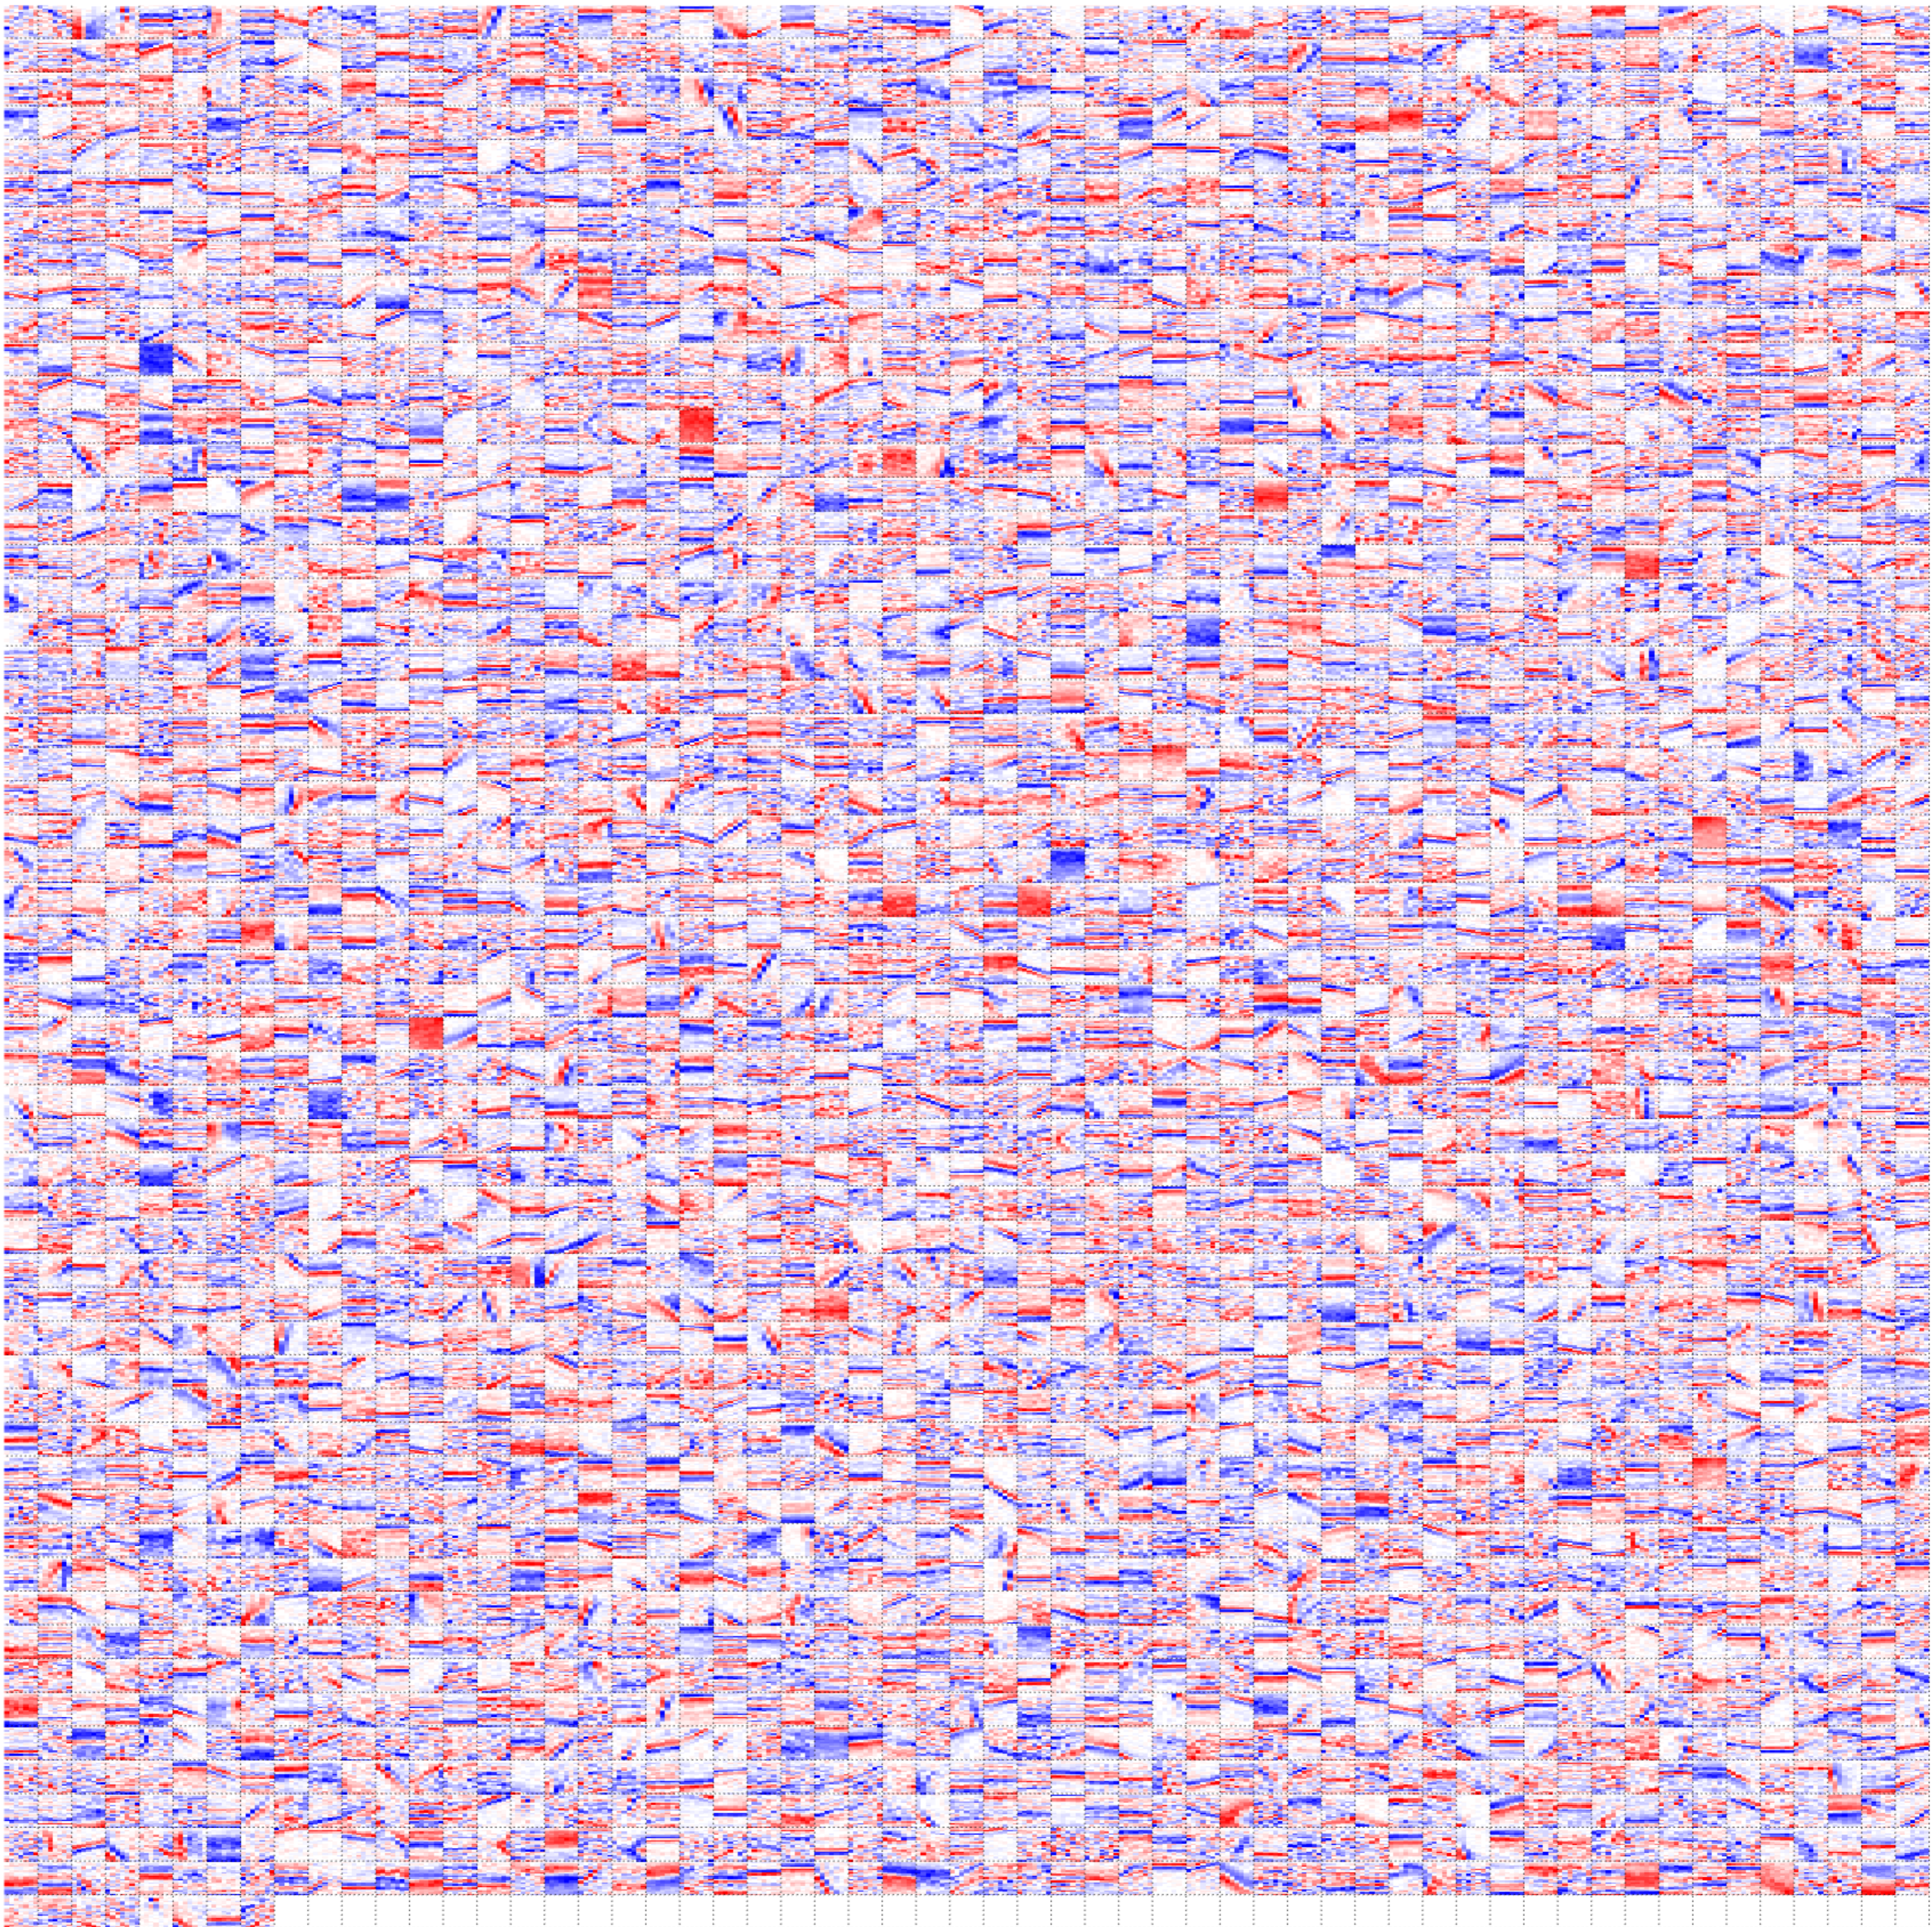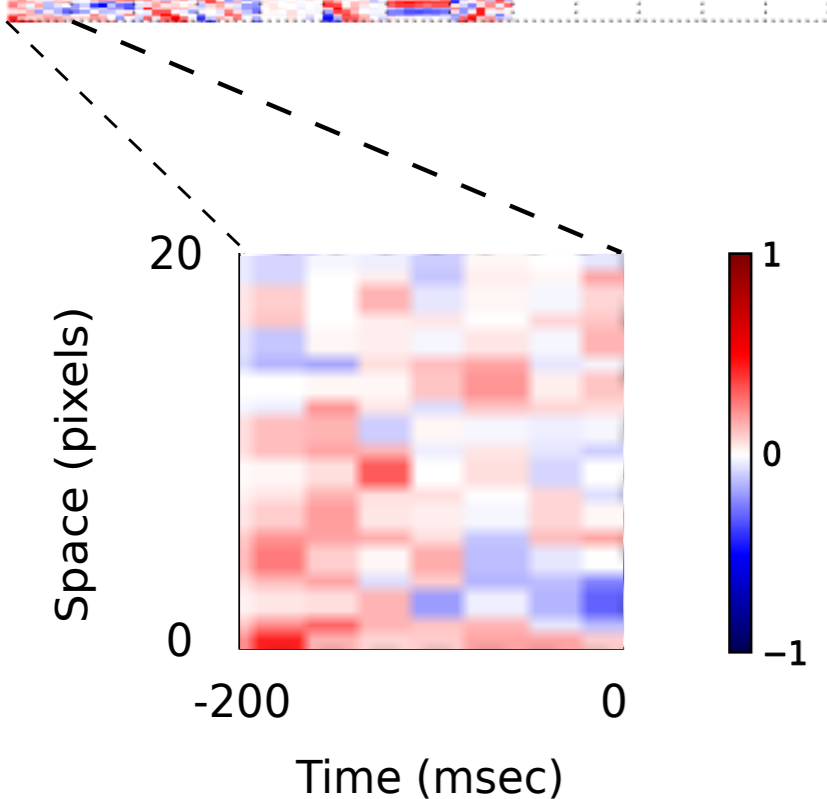

Supplement: supp [file elife-31557-supp-v1.zip › elife_poa_e31557_Figure_5_figure_supplement_2.pdf]

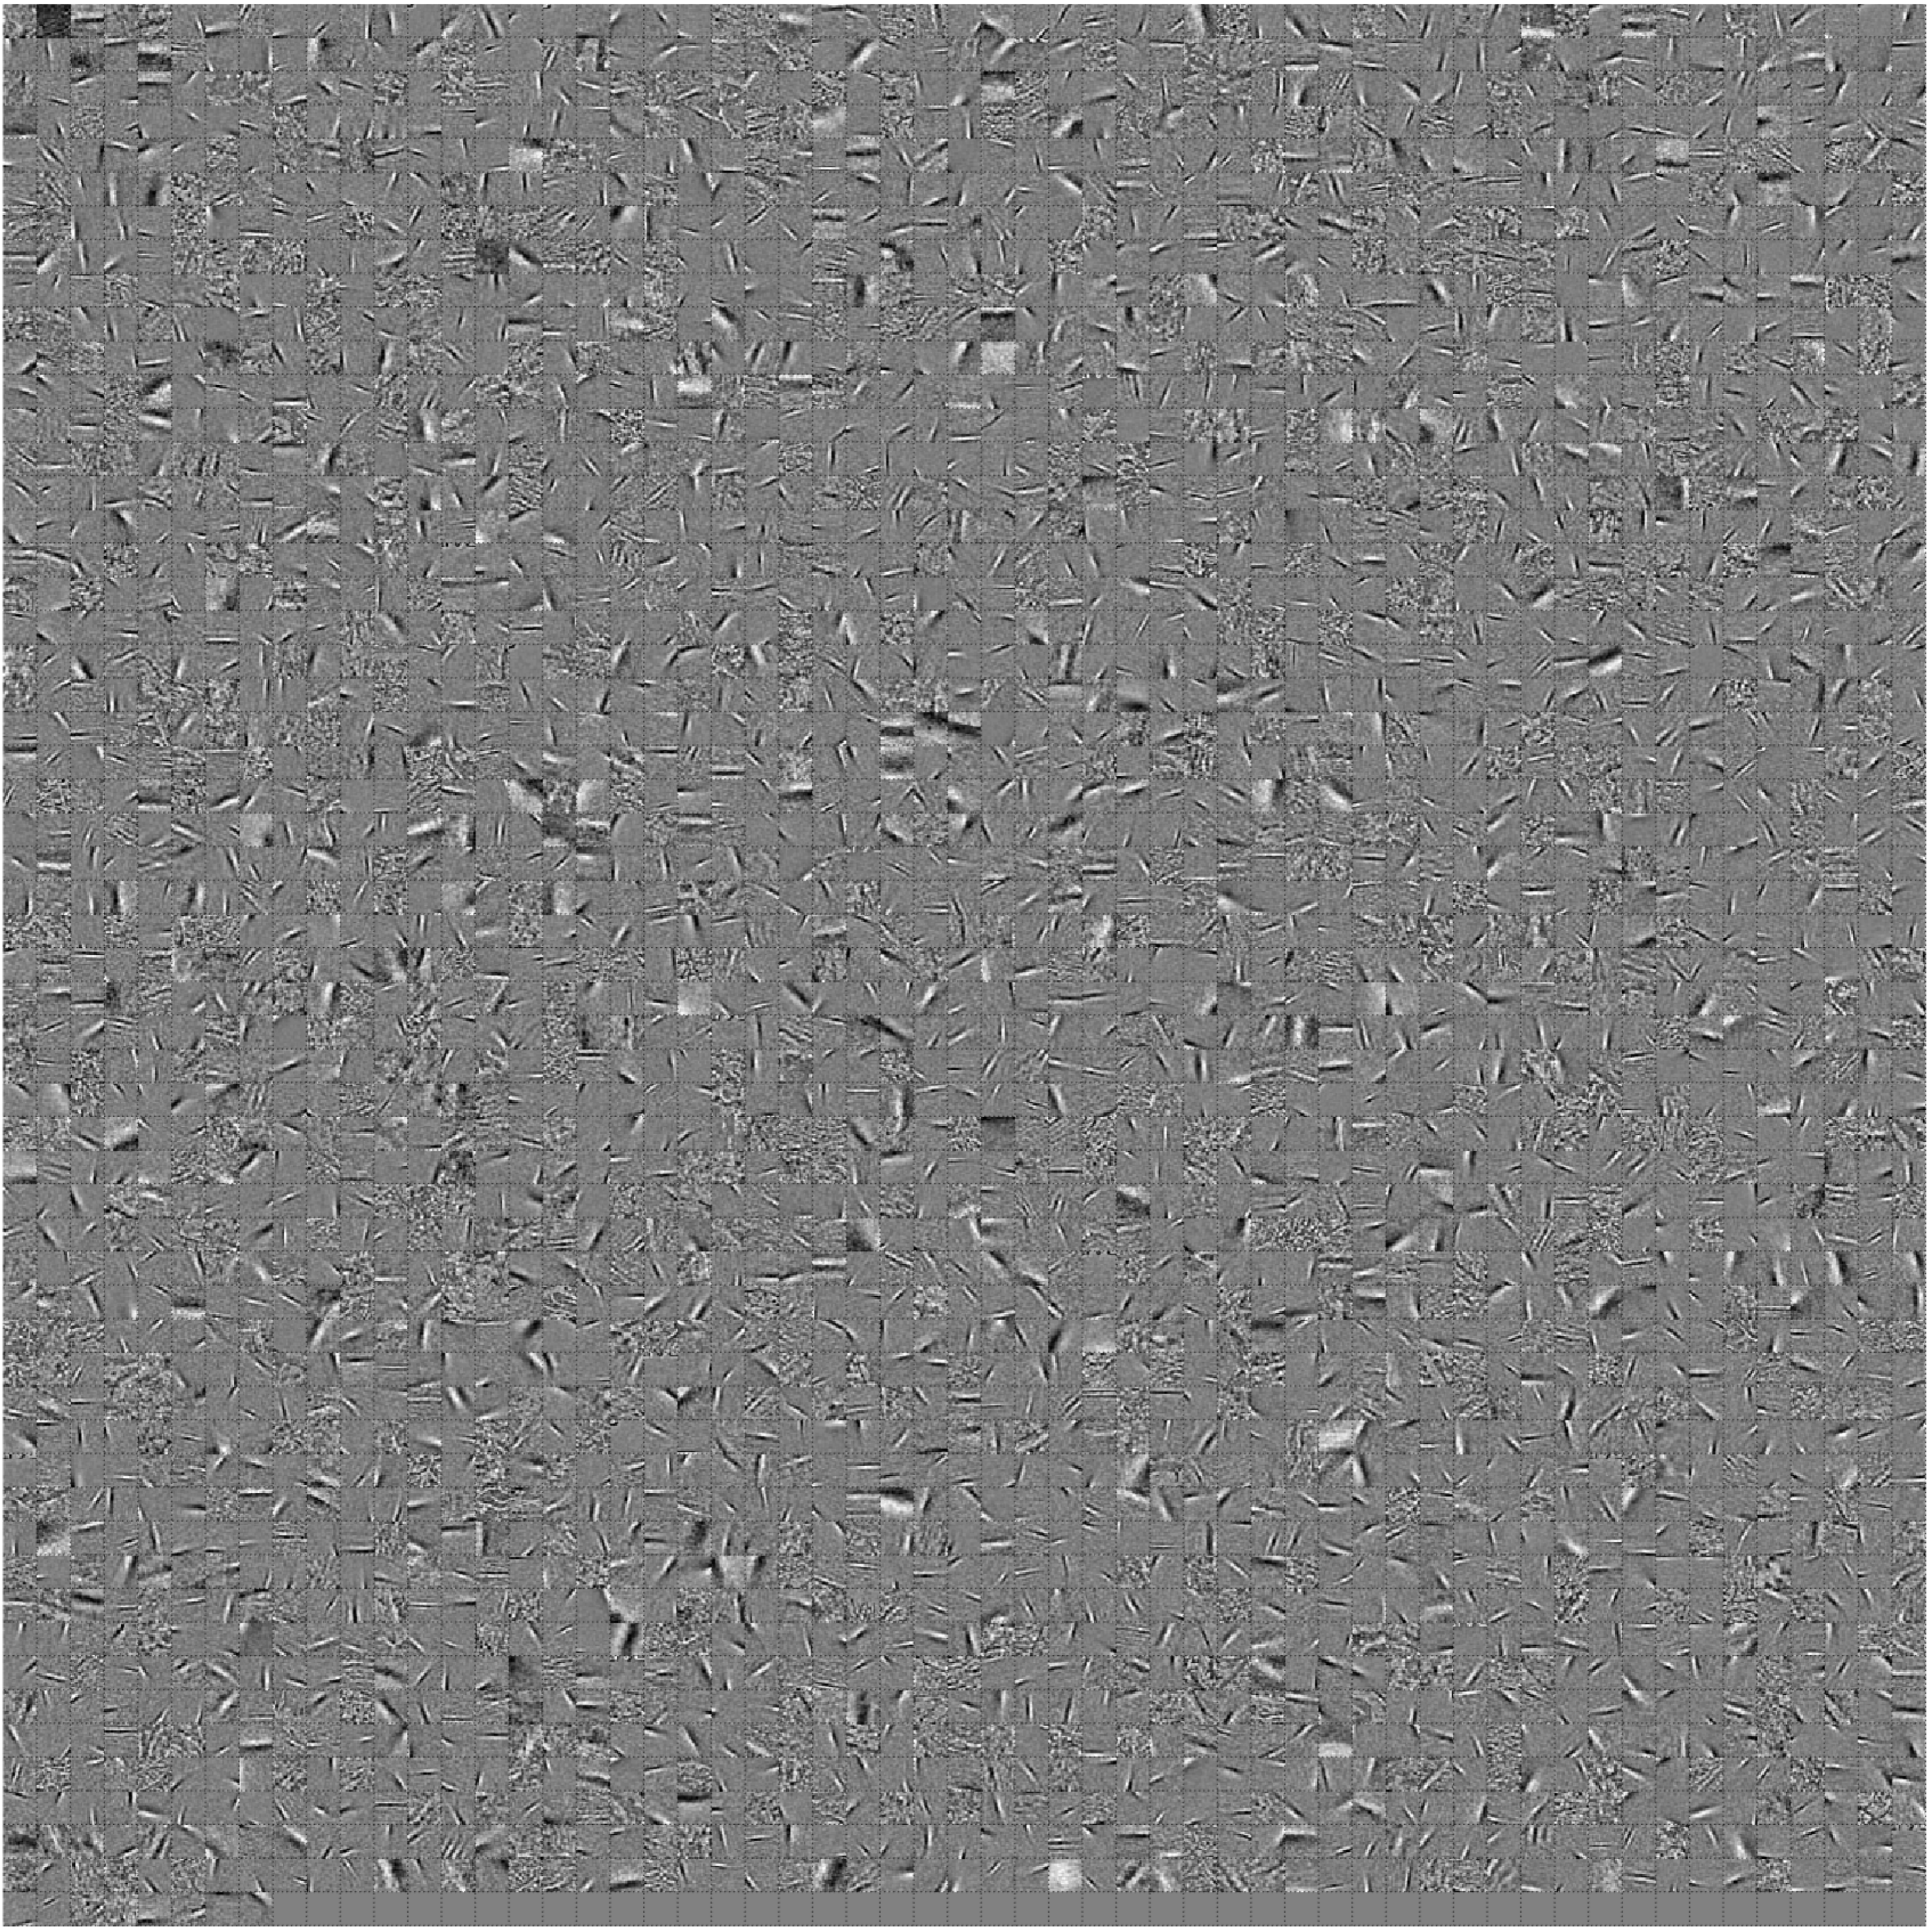

Supplement: supp [file elife-31557-supp-v1.zip › elife_poa_e31557_Figure_5_figure_supplement_4.pdf]
